# Supplementary material for: Phenotypic determinism and stochasticity in antibody repertoires of clonally expanded plasma cells
Source: PubMed Central journal article supplement — Proc Natl Acad Sci U S A. 2022 Apr 29;119(18):e2113766119. doi: 10.1073/pnas.2113766119 (PMC9170022; doi:10.1073/pnas.2113766119), 2022-04-29
Supplement: pnas.2113766119.sapp.pdf [file pnas.2113766119.sapp.pdf]

# Phenotypic determinism and stochasticity in antibody repertoires of clonally expanded plasma cells

Daniel Neumeier<sup>1,\*</sup>, Alexander Yermanos<sup>1,2,3,\*</sup>, Andreas Agrafiotis<sup>1,2</sup>, Lucia Csepregi<sup>1</sup>, Tasnia Chowdhury<sup>4</sup>, Roy A Ehling<sup>1</sup>, Raphael Kuhn<sup>1</sup>, Tudor-Stefan Cotet<sup>1</sup>, Raphaël Brisset-Di Roberto<sup>1</sup>, Mariangela Di Tacchio<sup>1</sup>, Renan Antonialli<sup>1</sup>, Dale Starkie<sup>4</sup>, Daniel J Lightwood<sup>4</sup>, Annette Oxenius<sup>2</sup> and Sai T Reddy<sup>1,#</sup>

<sup>1</sup>Department of Biosystems Science and Engineering, ETH Zürich, 4058 Basel, Switzerland

<sup>2</sup>Institute of Microbiology, ETH Zürich, 8093 Zurich, Switzerland

<sup>3</sup>Department of Pathology and Immunology, University of Geneva, 1205 Geneva, Switzerland

<sup>4</sup>UCB-Celltech Pharma, Berkshire, UK

#To whom correspondence should be addressed. Tel: +41 61 387 33 68; Email: sai.reddy@ethz.ch

\*Contributed equally to this work

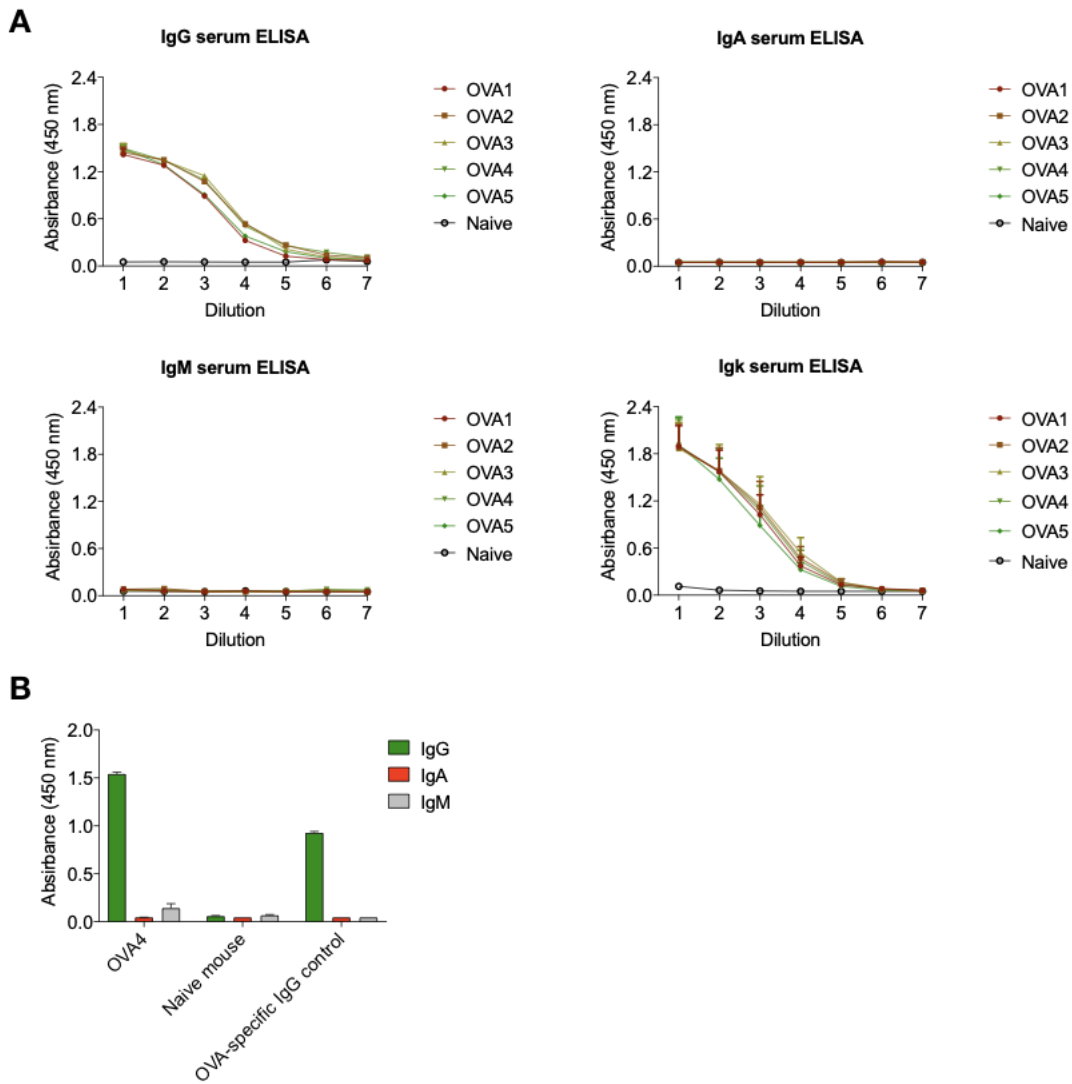

**Extended Data Figure 1. Isotype-specific enzyme-linked immunosorbent assay (ELISA) on serum.** A. OVA-specific ELISA was performed using IgG, IgA, IgM, and Igk detection antibodies. Serum was incubated with 1:5 serial dilutions of pre-diluted (1:100) serum. Unimmunized (naïve) serum served as control. B. OVA-specific ELISA on serum using 1:20 dilution. Supernatant from an IgG2c-expressing OVA-specific hybridoma cell line was used as a control.

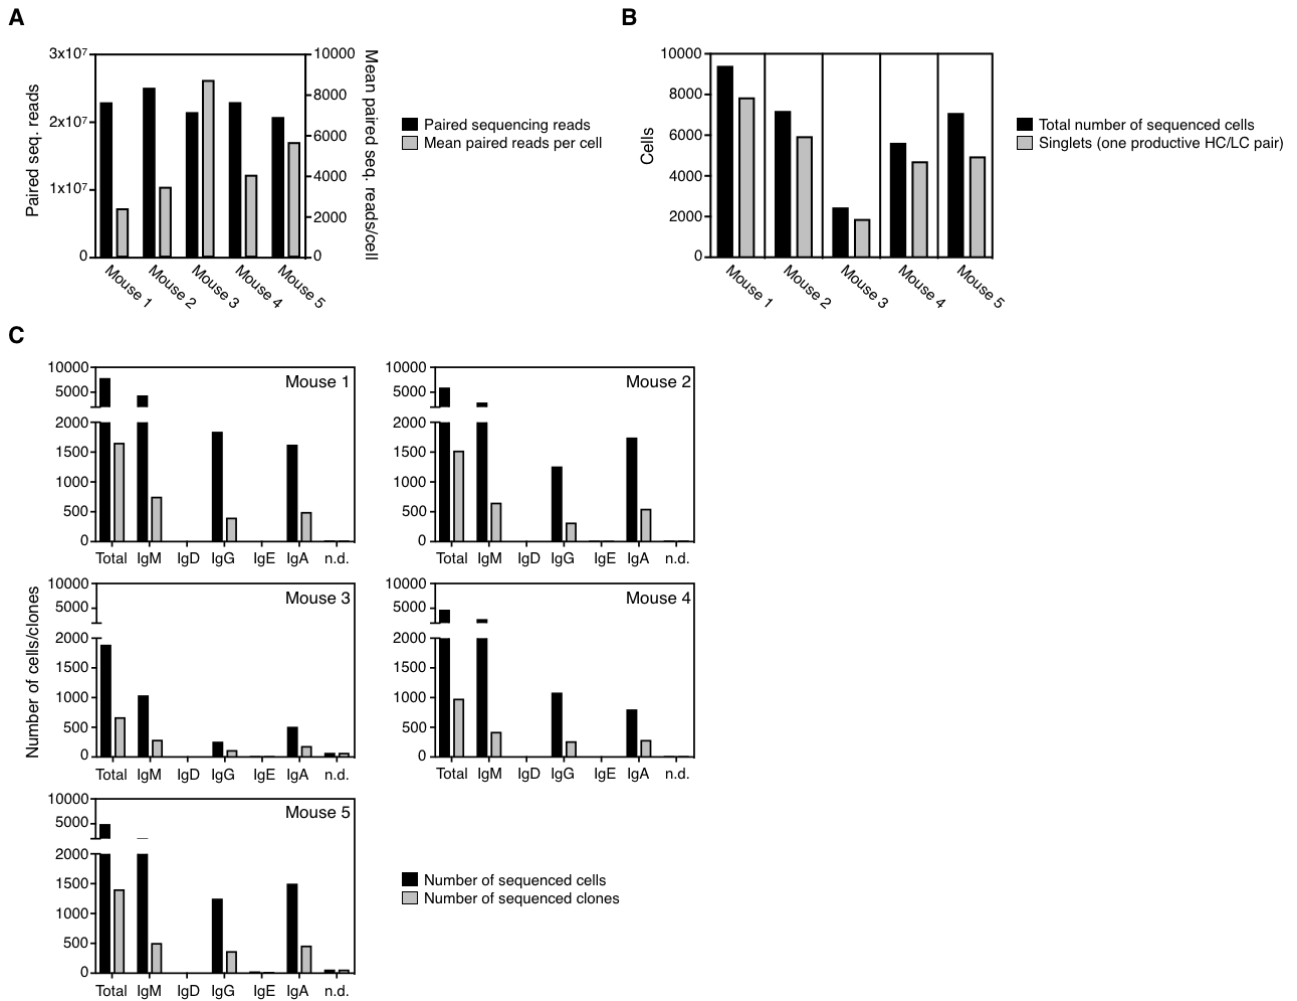

**Extended Data Figure 2. Single-cell sequencing statistics.** **a.** Total number of paired sequencing reads per mouse (black, left axis) and mean paired sequencing reads per cell (grey, right axis) for all mice. **b.** Number of all sequenced cells per mouse (black) and number of cells with one productive, full-length heavy- and light-chain pair (grey). **c.** Number of sequenced productive cells (black) and clones (grey) with isotype resolution for each mouse. Clonotype definition is based on unique CDRH3-CDRL3 amino acid combination.

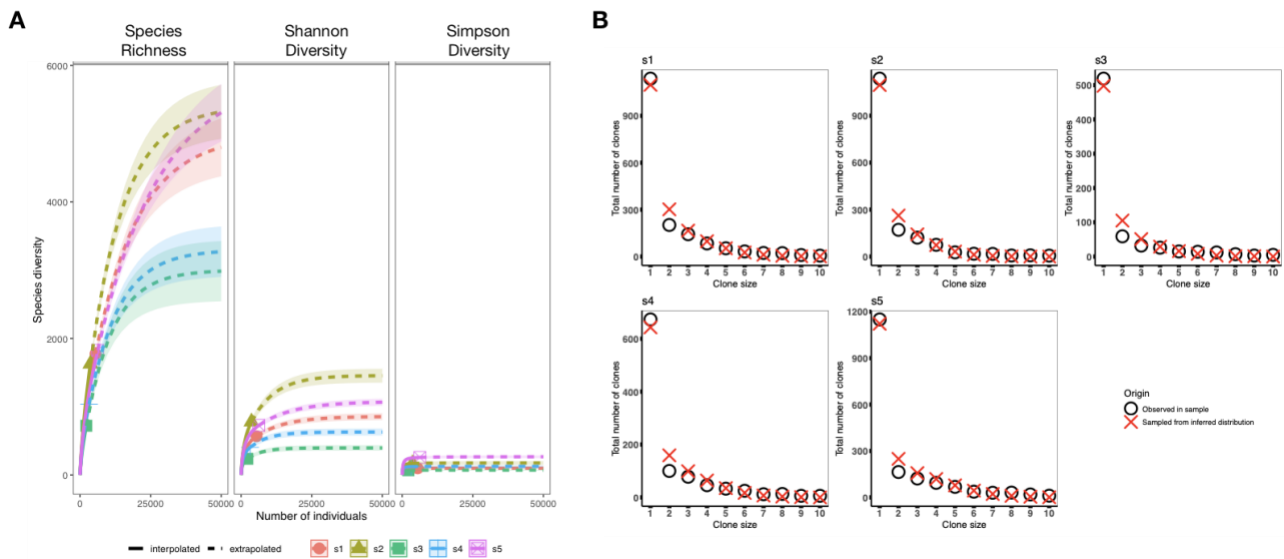

**Extended Data Figure 3. Rarefaction and sampling estimates of profiled repertoire.** **a.** Investigation of how under sampling the number of cells influences various species diversity metrics (species richness, Shannon diversity, Simpson diversity) for each immunized repertoire (s1-s5, indicated by color). Species richness refers to the number of unique clones. Dotted line indicates extrapolated diversity when sampling to 50,000 cells whereas solid line indicates sampled diversity. **b.** Recon estimates of the number of missing clones from each individual repertoire (s1-s5). Clone size refers to the number of cells within each clone. Recon suggests that sampled repertoire and predicted repertoire converge for clone sizes above approximately clone size = 2.

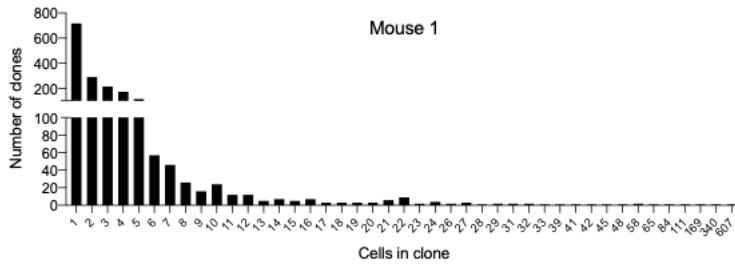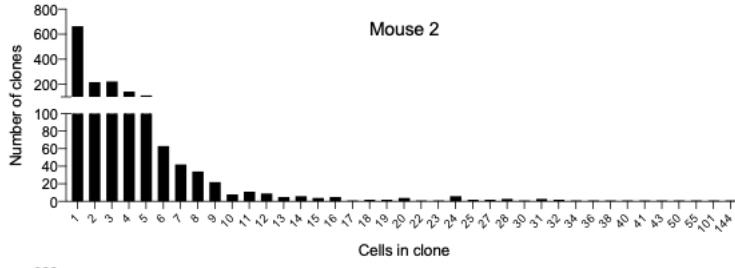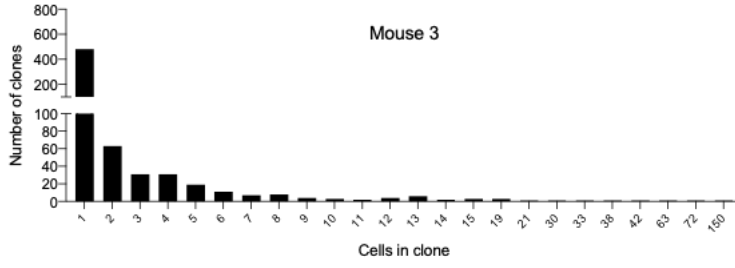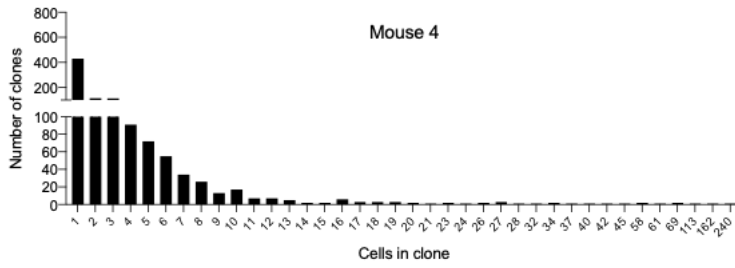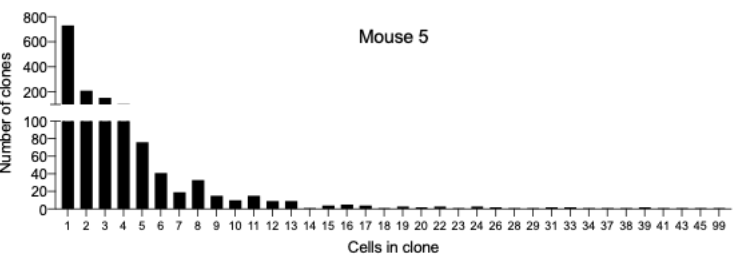

**A**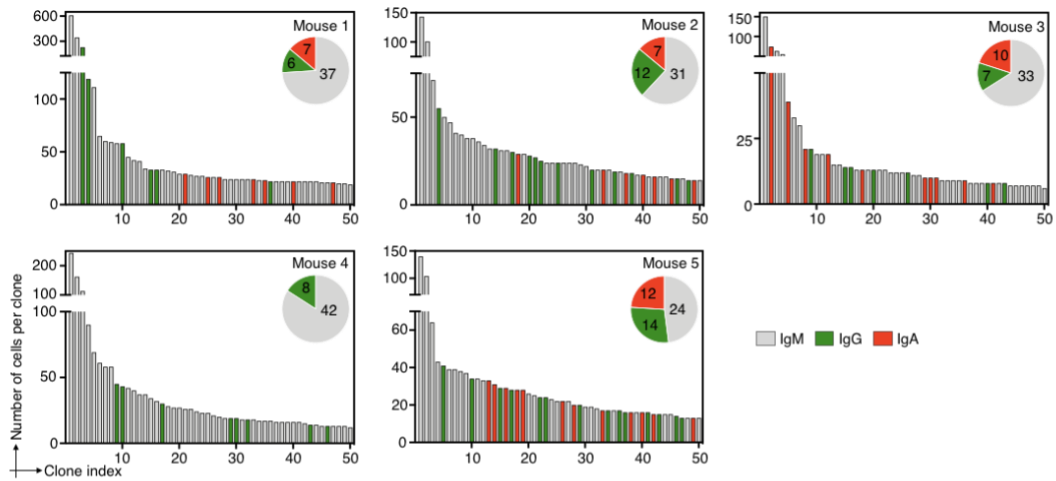**B**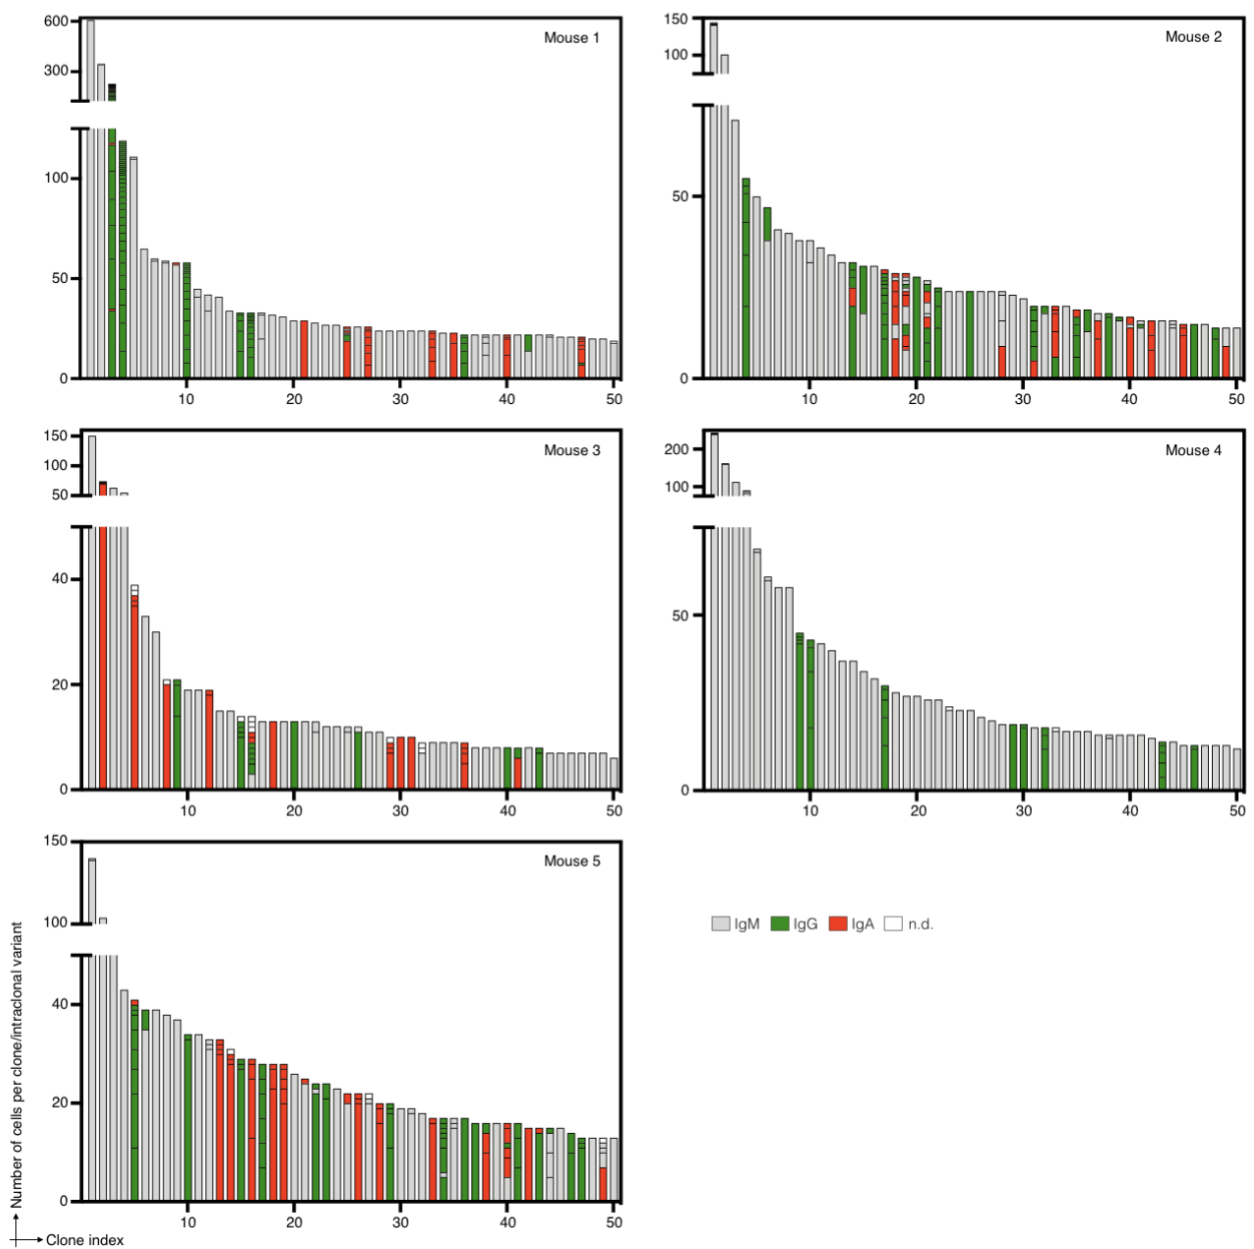

**Extended Data Figure 5. Clonal expansion profiles for the 50 most expanded clones per mouse. a.** Clonal expansion profiles based on isotype majority. Isotypes are indicated in grey (IgM), green (IgG) and red

(IgA) respectively. Pie-chart inset indicates the numbers of isotype clones among the top 50 clones shown. **b.** Clonal expansion profiles indicating all clonal amino acid sequence variants per clone and their respective isotype assignment. Separate clonal sequence variants are shown in stacked bar plots ordered by their respective size from bottom to top. Whenever a smaller sized bar of different isotype origin intersects two bigger bars, this indicates that these cells belong to the clonal variant below. Coloring scheme according to **a** with unassigned isotype cells shown in white.

**A**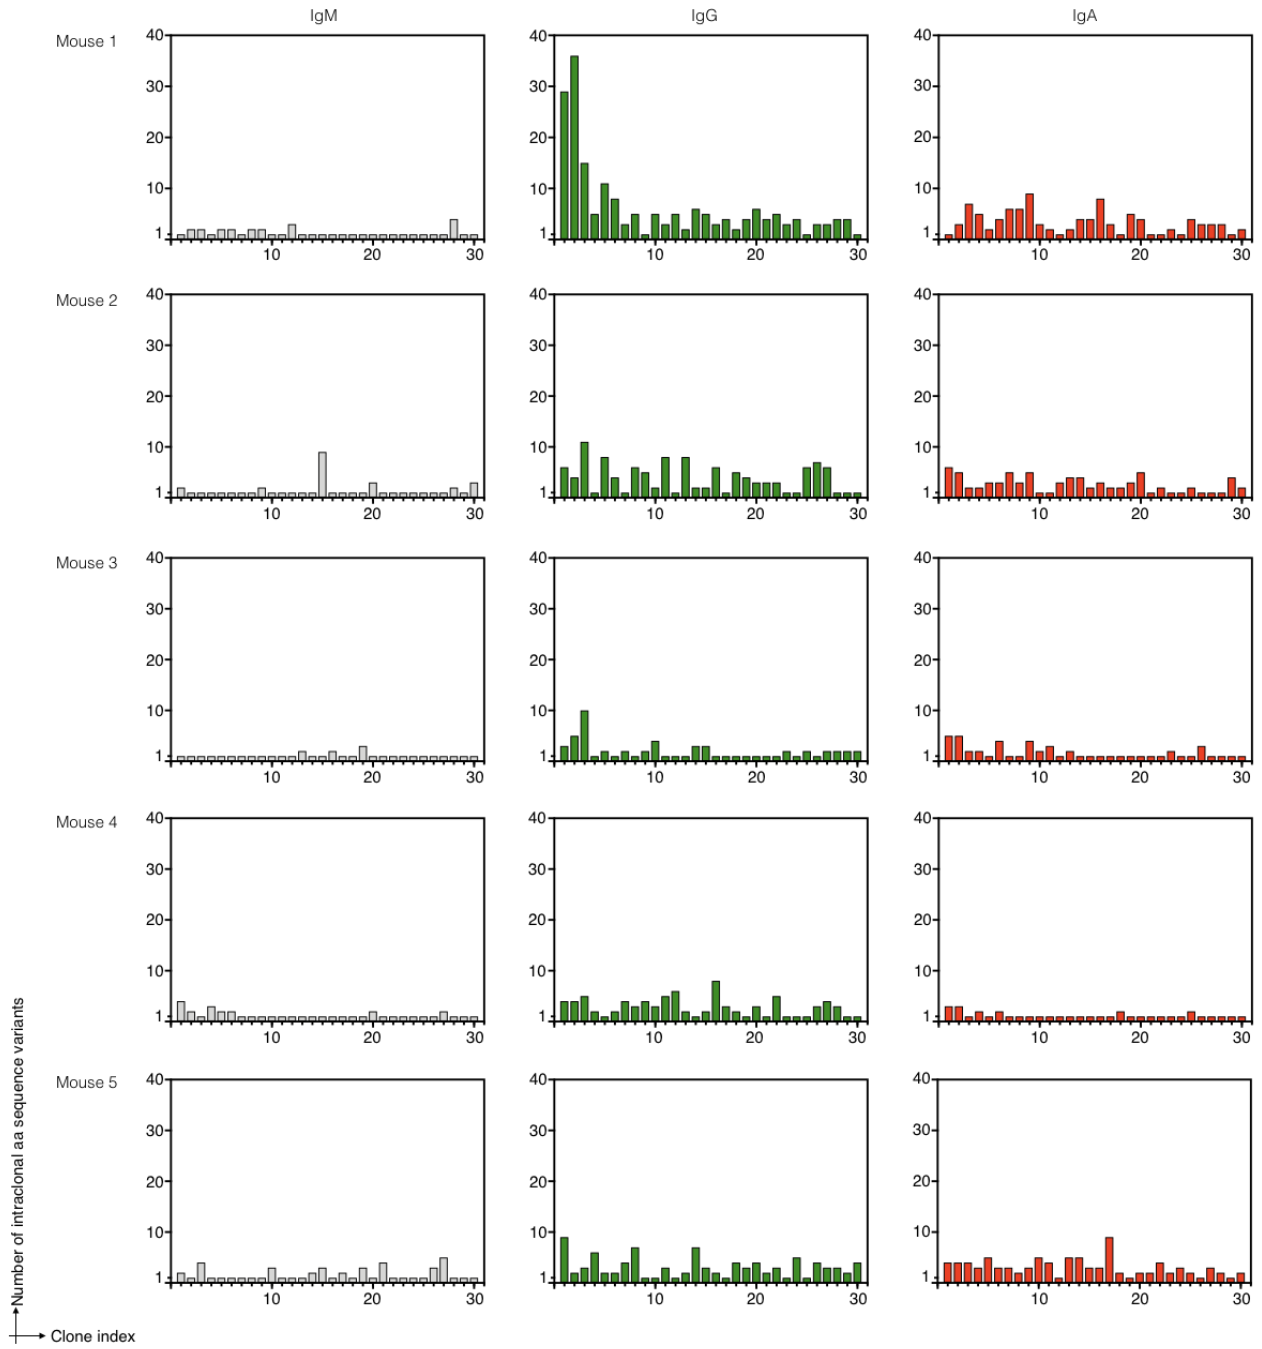**B**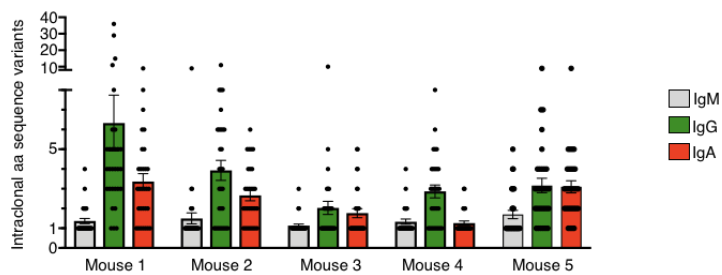

**Extended Data Figure 6. Intraclonal amino acid sequence variants for the 30 most expanded clones per isotype. a.** Total number of intraclonal amino acid sequence variants per individual clone per isotype for all mice. **b.** Mean number of intraclonal amino acid sequence variants per isotype for all mice.



**A**

| ID    | Clone rank IgM         | # cells | V <sub>H</sub> | CDRH3          | V <sub>L</sub> | CDRL3       | nt dist. (aa-changes) |
|-------|------------------------|---------|----------------|----------------|----------------|-------------|-----------------------|
| IgM-1 | 1, public (2 mice)     | 607     | IGHV3-1        | CATMITTWFAYW   | IGKV3-2        | CQQSKEVPWTF | 0                     |
| IgM-2 | 2, public (5 mice)     | 345     | IGHV11-2       | CMRYGNYWYFDVW  | IGKV14-126     | CLQHGESPFTF | 0                     |
| IgM-3 | 3                      | 111     | IGHV12-3       | CAGDRWGYWYFDVW | IGKV4-91       | CQQGSSIPYTF | 0                     |
| IgM-4 | 4                      | 65      | IGHV1-64       | CANWDYW        | IGKV5-48       | CQQSNSWWTF  | 1 (0)                 |
| IgM-5 | 5, public (5 mice)     | 58      | IGHV7-1        | CARDNWDWYFDVW  | IGKV15-103     | CQQGQSYPLTF | 0                     |
| IgM-6 | 27-33, public (5 mice) | 21      | IGHV7-1        | CARDDYDWYFDVW  | IGKV15-103     | CQQGQSYPLTF | 0                     |

**B**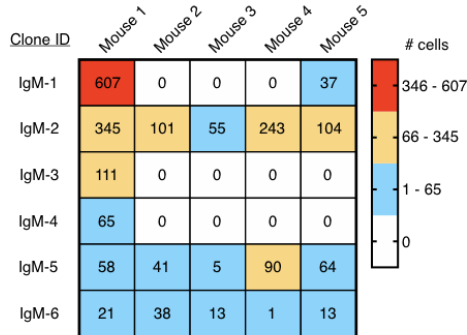**C**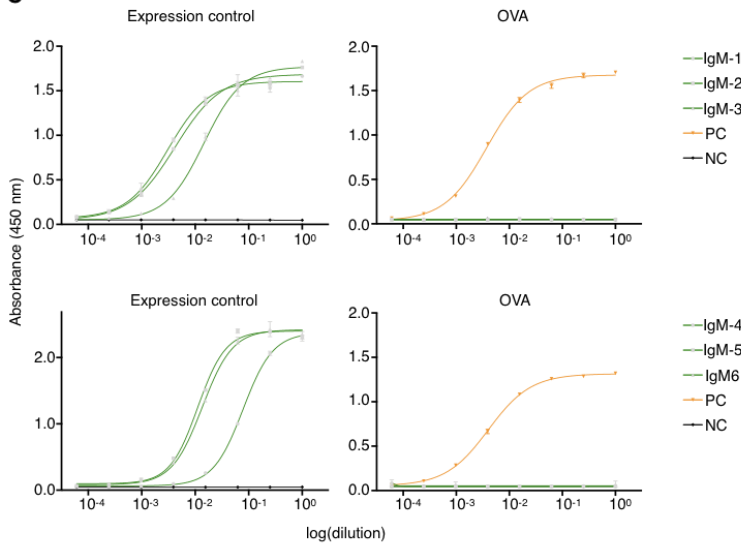**D**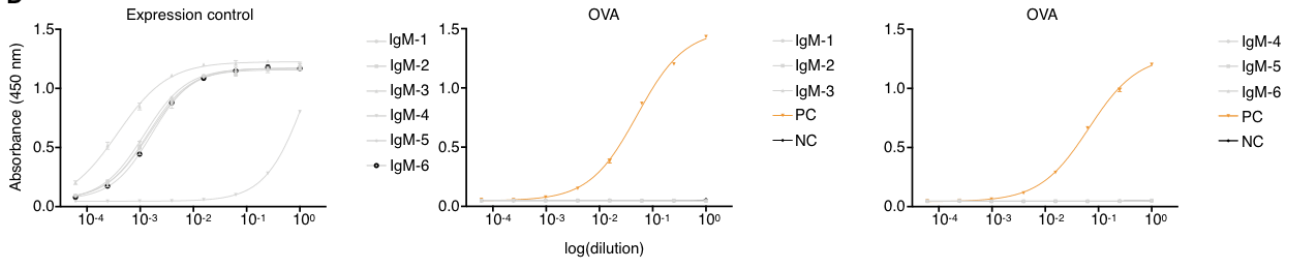**E**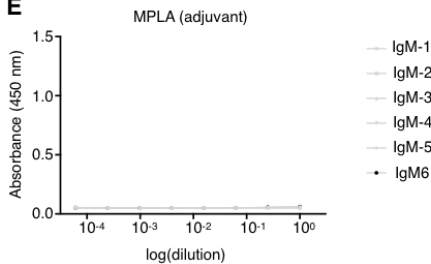

**Extended Data Figure 7. Profiling of expanded IgM clones of MS-1.** **a.** Characteristics of chosen clones. **b.** Heatmap indicating the number of cells per mouse with identical clonal CDRH3-CDRL3 amino acid sequence per chosen clone. Clone ID follows **a.** **c.** Sandwich ELISA results of 3-fold serially diluted stable hybridoma cell culture supernatant of engineered cell lines expressing selected clones as IgGs. Plots on the left indicate IgG expression levels and plots on the right show binding to OVA. For each sample, two technical

replicates were analysed and a four-parameter logistical curve was fitted to the data by nonlinear regression. Data are presented as the mean and error bars indicate standard deviation. Supernatant of a hybridoma cell line that does not express antibody served as negative control (NC, black) for the expression ELISA (left) and supernatant of an OVA specific inhouse cell line was used as positive control (PC, orange) for the antigen ELISA (right). **d.** Sandwich ELISA results of 3-fold serially diluted transient HEK-293 cell culture supernatant of cells expressing selected clones as IgM following **c.** Supernatant of IgM reformatted RSVF specific inhouse antibody served as negative control (NC, black) and supernatant of IgM reformatted positive clone from **c** served as positive control (PC, orange). **e.** Sandwich ELISA results on transient HEK-293 cell culture supernatant of cells expressing selected clones as IgM for binding to MPLA adjuvant.

**A**

| ID     | Clone rank | IgA | # cells | V <sub>H</sub> | CDRH3          | V <sub>L</sub> | CDRL3       | nt dist. (aa-changes) |
|--------|------------|-----|---------|----------------|----------------|----------------|-------------|-----------------------|
| IgA-7  | 1          |     | 29      | IGHV1-22       | CVRRGSPDYYFDYW | IGKV5-43       | CQQSNSWPLTF | 24nt (18)             |
| IgA-8  | 2-3        |     | 26      | IGHV1-53       | CARSLYDYGAYW   | IGKV10-94      | CQQYSKLPRTF | 8nt (1)               |
| IgA-9  | 2-3        |     | 26      | IGHV3-1        | CARSGTTPDYW    | IGKV6-15       | CQQYNSYPLTF | 22nt (8)              |
| IgA-10 | 5          |     | 23      | IGHV7-3        | CPREYFGSFAYW   | IGKV15-103     | CQQGQSYPWTF | 12nt (9)              |
| IgA-11 | 7          |     | 21      | IGHV3-1        | CARGGNYPYFDYW  | IGKV4-61       | CQQYHSYPPTF | 22nt (15)             |

**B**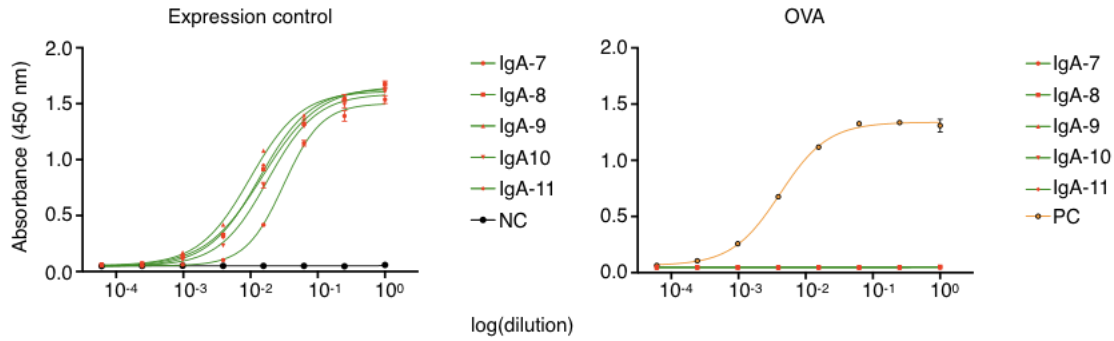

**Extended Data Figure 8. Profiling of expanded IgA clones of MS-1.** **a.** Characteristics of chosen clones. **b.** Sandwich ELISA results of 3-fold serially diluted stable hybridoma cell culture supernatant of engineered cell lines expressing selected clones as IgGs. Plot on the left indicates IgG expression levels and plot on the right shows binding to OVA. For each sample, two technical replicates were analysed and a four-parameter logistical curve was fitted to the data by nonlinear regression. Data are presented as the mean and error bars indicate standard deviation. Supernatant of a hybridoma cell line that does not express antibody served as negative control (NC, black) for the expression ELISA (left) and supernatant of an OVA specific inhouse cell line was used as positive control (PC, orange) for the antigen ELISA (right).

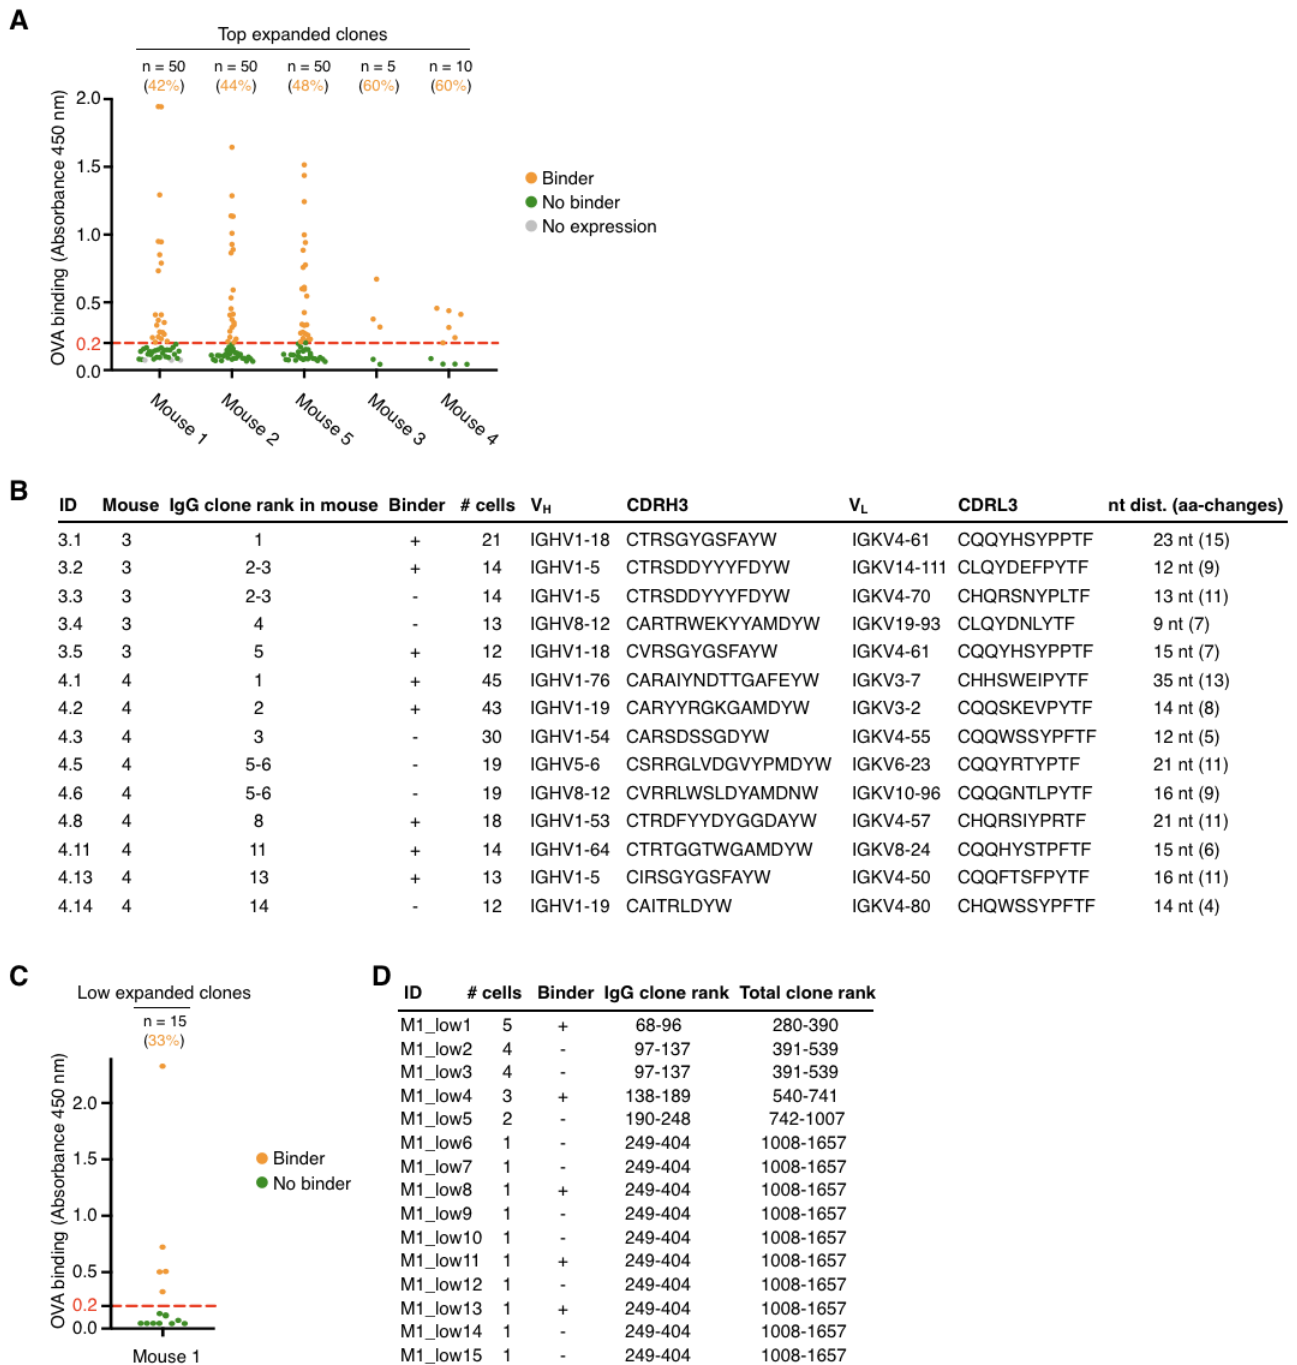

**Extended Data Figure 9. Profiling of top and low expanded IgG clones per mouse.** **a.** ELISA profiling results of all top expanded clones tested per mouse. Clones were denoted binders if ELISA signal was  $>0.2$  (3-fold above background; red dotted line). Binders are shown in orange, whereas clones that did not bind OVA or could not be expressed are shown in green and grey respectively. **b.** Overview of tested top expanded clones of MS-3 and -4. + denotes ELISA signal  $>0.2$ . **c.** ELISA profiling results of all low expanded MS-1 clones tested. **d.** Table indicating binding of low expanded clones as well as number of cells and corresponding IgG and total clone ranks within MS-1 repertoire.

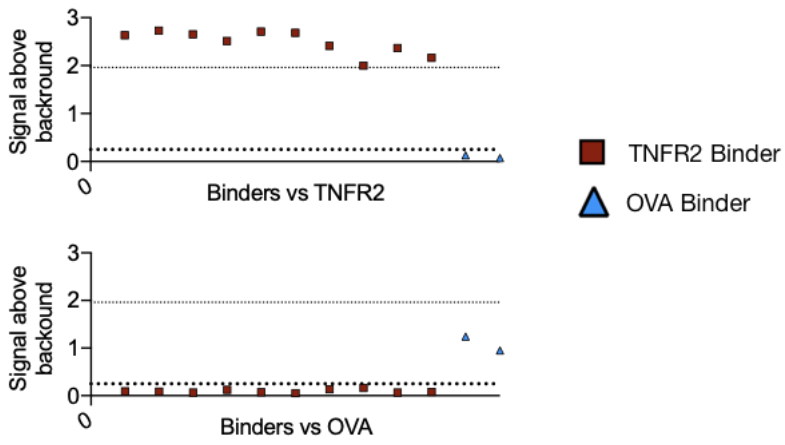

**Extended Data Figure 10. Profiling of antibodies with known specificity against OVA.** ELISA profiling results of ten antibodies with known specificity to human TNFR2 compared to ten antibodies determined as OVA-specific.

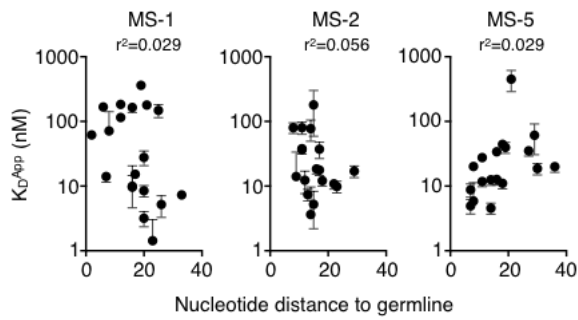

**Extended Data Figure 11. Correlation between apparent dissociation constant ( $K_D^{App}$ ) and nucleotide distance to germline of clones shown in Fig. 2a, b.**

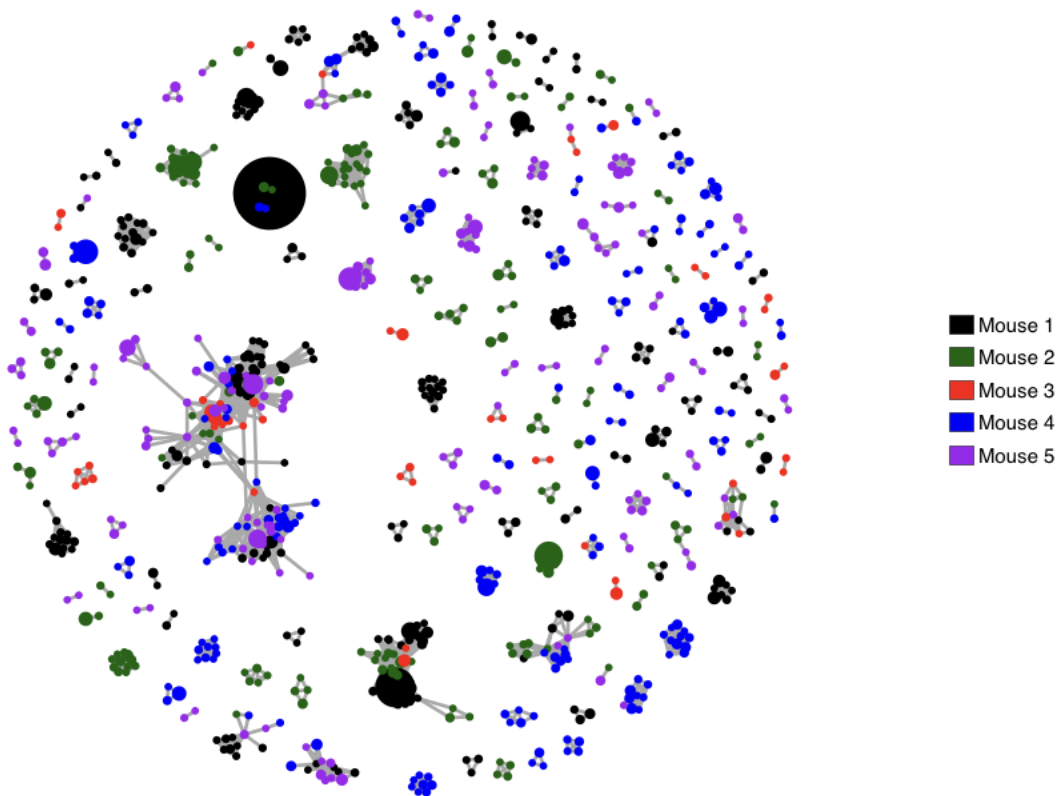

**Extended Data Figure 12. IgG similarity network.** Global IgG similarity network plot for all IgG clones across all mice. Edges represent sequence nodes separated by edit distance of less than four a.a. Only those nodes with at least one edge are plotted for visualization purposes. Clones from different mice are indicated in different colors respectively. Extent of clonal expansion per clone is reflected by the size of the nodes.

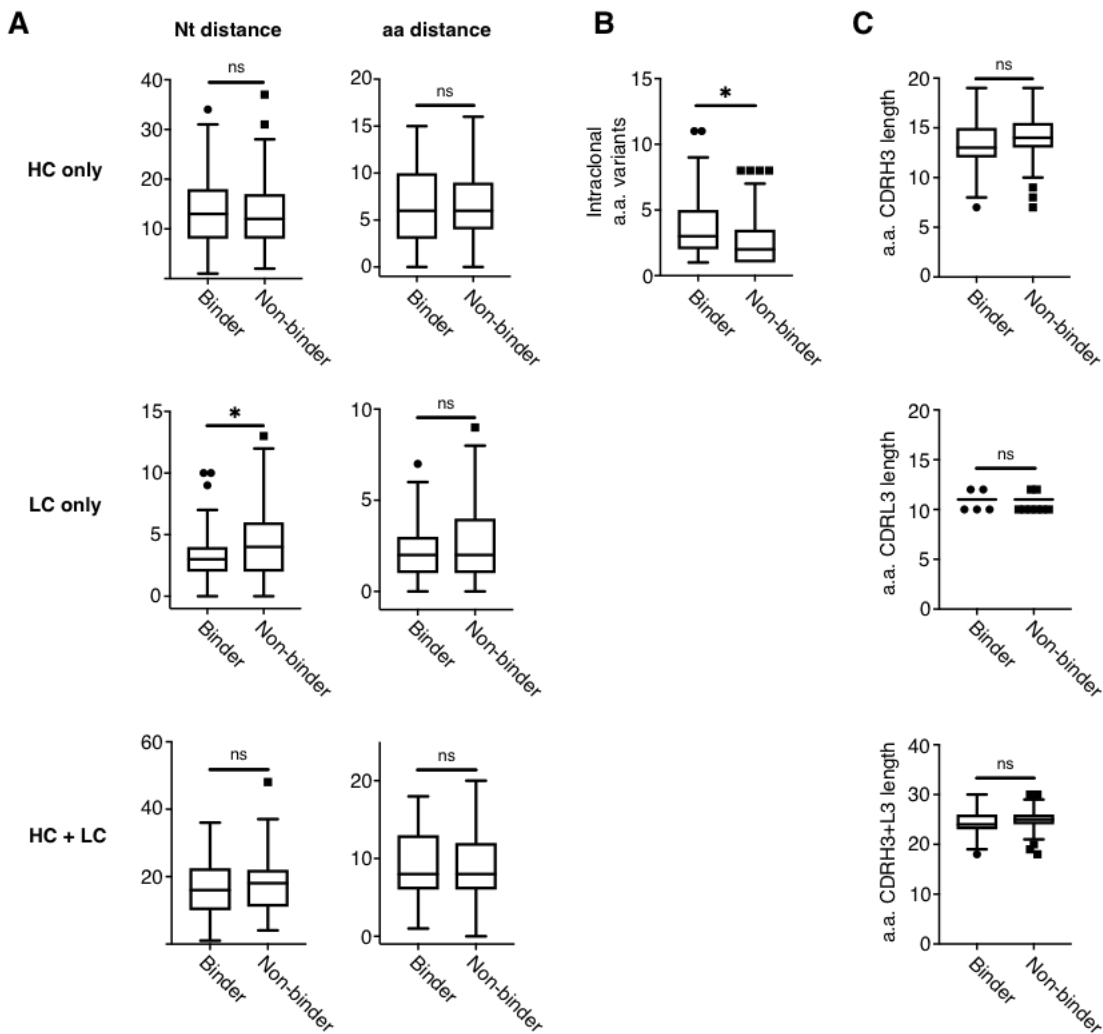

**Extended Data Figure 13. Selected metrics for binder- and non-binder pools of clones. a.** Left: nucleotide distance to germline for heavy- and light-chain only as well as across heavy- and light-chain combined. Top: ns, not significant ( $P=0.70$ ); middle:  $*P=0.02$ ; bottom: ns, not significant ( $P=0.64$ ); unpaired Student's  $t$ -test. Right: amino acid distance to germline for heavy- and light-chain only as well as across heavy- and light-chain combined. Top: ns, not significant ( $P=0.77$ ); middle: ns, not significant ( $P=0.11$ ); bottom: ns, not significant ( $P=0.69$ ); unpaired Student's  $t$ -test. Analysis encompassed 174 experimentally verified sequences (79 binder and 95 non-binder) provided in **Extended Data Table 1** and **2** respectively. **b.** Number of intracлонаl amino acid sequence variants.  $*P=0.02$ , unpaired Student's  $t$ -test. Analysis contained all sequences provided in **Extended Data Table 1** and **2** except for singlet clones (76 binder and 87 non-binder). **c.** CDR3 amino acid length for CDRH3 and CDRL3 as well as CDRH3/L3 combined. Top: ns, not significant ( $P=0.44$ ); middle: ns, not significant ( $P=0.49$ ); bottom: ns, not significant ( $P=0.49$ ); unpaired Student's  $t$ -test. Analysis encompassed experimentally verified sequences (79 binder and 95 non-binder) provided in **Extended Data Table 1** and **2**.

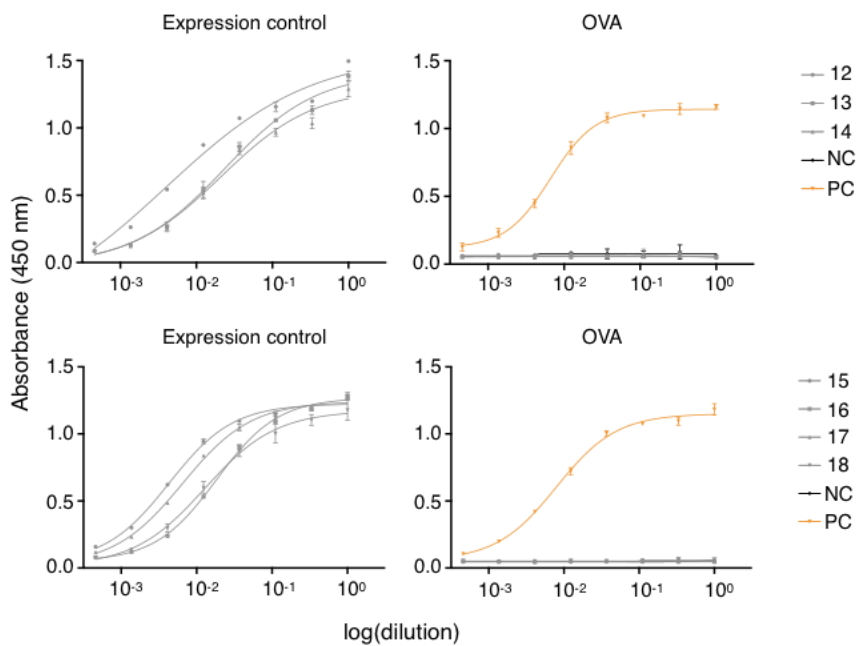

**Extended Data Figure 14. ELISA screening of multi-isotype clones shown in Fig. 2g.** Sandwich ELISA results of 3-fold serially diluted stable hybridoma cell culture supernatant of engineered cell lines expressing selected clones as IgGs. Plots on the left indicate IgG expression levels and plot on the right shows binding to OVA. For each sample, two technical replicates were analysed and a four-parameter logistical curve was fitted to the data by nonlinear regression. Data are presented as the mean ( $n = 2$  measurements) and error bars indicate standard deviation. Supernatant of a HEL specific hybridoma cell line served as negative control (NC, black) and supernatant of an OVA specific inhouse cell line was used as positive control (PC, orange).



**A**

| ID.      | # cells | $K_D^{App}$ [nM] | nt dist. (aa) | VH/VL             | CDRH3/L3                  | Mouse |
|----------|---------|------------------|---------------|-------------------|---------------------------|-------|
| Germline |         | n.d.             | 0 nt (0)      | IGHV1-18/IGKV4-63 | CARGGYGNPFAYW/CFQGSYPLTF  |       |
| aIX      | 1       | 315.6 ± 93.9     | 8 nt (6)      | IGHV1-18/IGKV4-63 | CARGGYGVPFAYW/CFQGNFYPLTF | 2     |
| aIII     | 4       | 8.9 ± 1.0        | 20 nt (10)    | IGHV1-18/IGKV4-61 | CTRGGYGTFFAYW/CQQYHSYPLTF | 1     |
| bX       | 3       | 4.0 ± 1.2        | 11 nt (6)     | IGHV1-18/IGKV4-61 | CARGGYGC-FAYW/CQQYHSYPLTF | 5     |
| bVIII    | 10      | 43.7 ± 0.6       | 16 nt (11)    | IGHV1-18/IGKV4-63 | CARGGYGNPFAYW/CFQGSYPLTF  | 1     |
| bVII     | 4       | 11.1 ± 0.2       | 16 nt (11)    | IGHV1-18/IGKV4-63 | CARGGYGNPFAYW/CFQGSYPLTF  | 1     |
| cVII     | 5       | 27.4 ± 2.0       | 18 nt (12)    | IGHV1-18/IGKV4-63 | CARGGYGNPFAYW/CFQGSYPLTF  | 1     |
| dII      | 5       | 11.3 ± 1.1       | 20 nt (15)    | IGHV1-18/IGKV4-63 | CARGGYGNPFAYW/CFQGSYPLTF  | 1     |
| aVII     | 7       | 33.2 ± 3.8       | 18 nt (14)    | IGHV1-18/IGKV4-63 | CARGGYGNPFAYW/CFQGSYPLTF  | 1     |
| cIX      | 1       | 23.3 ± 1.0       | 15 nt (11)    | IGHV1-18/IGKV4-63 | CARGGYGTPFAYW/CFQGSYPLTF  | 1     |
| bII      | 3       | 12.4 ± 1.3       | 19 nt (11)    | IGHV1-18/IGKV4-63 | CARGGYGNPFAYW/CFQGSYPLTF  | 1     |
| aII      | 13      | 4.5 ± 1.4        | 18 nt (12)    | IGHV1-18/IGKV4-63 | CARGGYGNPFAYW/CFQGSYPLTF  | 1     |
| dVII     | 7       | 6.3 ± 0.9        | 26 nt (15)    | IGHV1-18/IGKV4-63 | CARGGYGNPFAYW/CFQGSYPLTF  | 1     |
| dIII     | 11      | 5.2 ± 3.0        | 22 nt (14)    | IGHV1-18/IGKV4-63 | CARGGYGNPFAYW/CFQGSYPLTF  | 1     |
| bIX      | 25      | 7.7 ± 0.4        | 21 nt (14)    | IGHV1-18/IGKV4-63 | CARGGYGNPFAYW/CFQGSYPLTF  | 1     |
| cIV      | 2       | 451.1 ± 36.4     | 24 nt (19)    | IGHV1-18/IGKV4-63 | CARGGYGNPFYTW/CFQGSYPLTF  | 1     |
| aI       | 7       | 6.5 ± 0.7        | 20 nt (15)    | IGHV1-18/IGKV4-63 | CARGGYGNPFAYW/CFQGSYPLTF  | 1     |
| aVIII    | 14      | 11.1 ± 0.7       | 23 nt (16)    | IGHV1-18/IGKV4-63 | CARGGYGNPFAYW/CFQGSYPLTF  | 1     |
| aVI      | 1       | 7.9 ± 1.8        | 24 nt (17)    | IGHV1-18/IGKV4-63 | CARGGYGNPFAYW/CFQGSYPLTF  | 1     |
| dIV      | 1       | 6.4 ± 0.9        | 19 nt (15)    | IGHV1-18/IGKV4-63 | CTRGGYGNPFAYW/CFQGSYPLTF  | 1     |
| bIII     | 9       | 7.9 ± 2.2        | 22 nt (16)    | IGHV1-18/IGKV4-63 | CARGGYGNPFAYW/CFQGSYPLTF  | 1     |
| cVIII    | 10      | 7.8 ± 0.3        | 22 nt (15)    | IGHV1-18/IGKV4-63 | CARGGYGNPFAYW/CFQGSYPLTF  | 1     |
| bIV      | 14      | 11.6 ± 1.3       | 19 nt (14)    | IGHV1-18/IGKV4-63 | CARGGYGNPFAYW/CFQGSYPLTF  | 1     |
| dVIII    | 35      | 11.4 ± 0.6       | 20 nt (13)    | IGHV1-18/IGKV4-63 | CARGGYGNPFAYW/CFQGSYPLTF  | 1     |

**B**

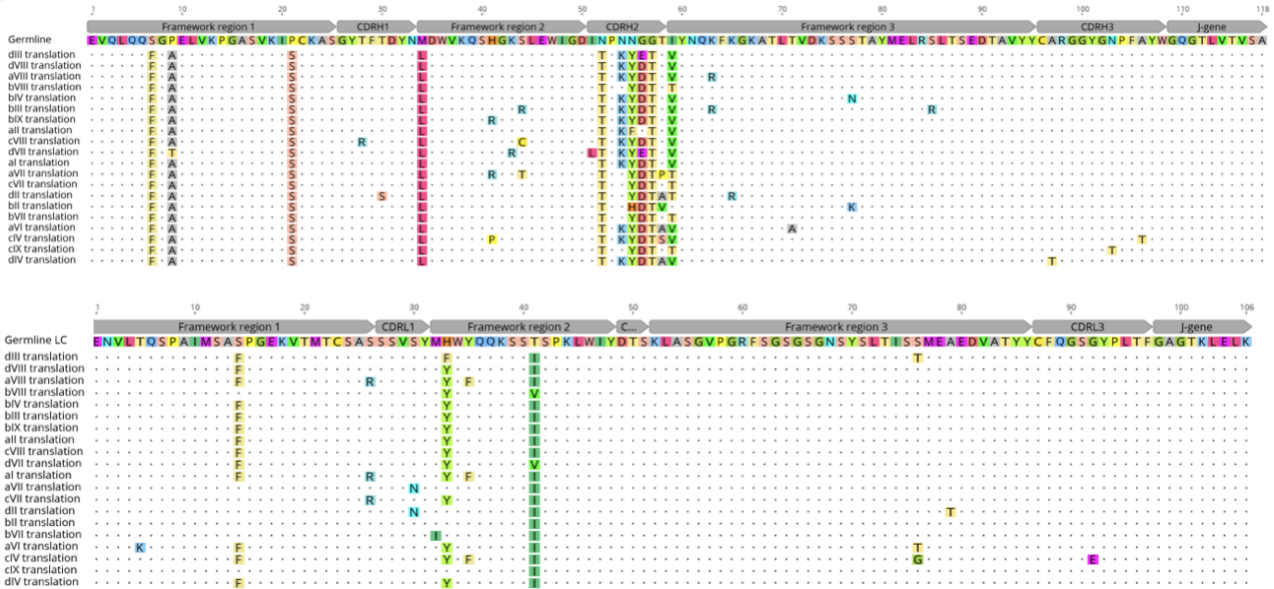

**Extended Data Figure 15. Characteristics of tested intraclonal sequence variants shown in Fig. 3b. a.** Characteristics of tested variants. Differences in  $V_L$  gene usage and CDR3 amino acid sequence as well as sequences coming from different mice are indicated in red. **b.** Heavy (top) and light-chain (bottom) amino acid sequence alignment of clones with shared V/J genes. Sequence disagreements to germline are highlighted.

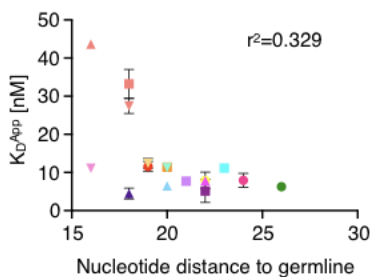

**Extended Data Figure 16.** Correlation between apparent dissociation constant ( $K_D^{App}$ ) and nucleotide distance to germline. Error bars indicate standard deviation ( $n = 3-5$  measurements of  $K_D$ ).

**A**

| ID       | Mouse | # cells | V <sub>H</sub> | CDRH3                  | V <sub>L</sub> | CDRL3                        | nt dist. (aa-changes) | K <sub>D</sub> <sup>APP</sup> [nM] |
|----------|-------|---------|----------------|------------------------|----------------|------------------------------|-----------------------|------------------------------------|
| Germline |       |         | IGHV9-1        | CAREASYWYFDVW          | IGKV3-12       | CQHSRELRTF                   | 0 nt (0)              |                                    |
| cVI      | 5     | 3       | IGHV9-1        | CAREASYWYFDVW          | IGKV3-12       | CQHSRELRTF                   | 15 nt (10)            | n.d.                               |
| dl       | 5     | 2       | IGHV9-1        | CAREASYWYFDVW          | IGKV3-12       | CQHSRELRTF                   | 21 nt (14)            | n.d.                               |
| cX       | 2     | 3       | IGHV9-1        | CAR <b>T</b> ESYWYFDVW | IGKV3-12       | CQH <b>R</b> EL <b>W</b> TF  | 25 nt (16)            | 7.7 ± 3.8                          |
| alV      | 4     | 2       | IGHV9-1        | CAR <b>V</b> STYWYFDVW | IGKV3-12       | CQHS <b>R</b> DL <b>W</b> TF | 41 nt (20)            | 3.4 ± 0.2                          |
| dX       | 4     | 2       | IGHV9-1        | CAR <b>V</b> STYWYFDVW | IGKV3-12       | CQHS <b>R</b> DL <b>W</b> TF | 46 nt (22)            | 3.8 ± 1.0                          |
| dV       | 4     | 2       | IGHV9-1        | CAR <b>V</b> STYWYFDVW | IGKV3-12       | CQHS <b>R</b> DL <b>W</b> TF | 29 nt (19)            | 26.0 ± 4.9                         |
| cl       | 5     | 5       | IGHV9-1        | CAR <b>L</b> QSYWYFDVW | IGKV3-12       | CQHSRELRTF                   | 21 nt (11)            | 11.9 ± 0.3                         |
| aX       | 5     | 8       | IGHV9-1        | CAR <b>L</b> QSYWYFDVW | IGKV3-12       | CQHSRELRTF                   | 21 nt (11)            | 14.4 ± 1.5                         |
| bVI      | 5     | 5       | IGHV9-1        | CAR <b>L</b> QSYWYFDVW | IGKV3-12       | CQHSRELRTF                   | 25 nt (14)            | 10.3 ± 1.6                         |

**B**

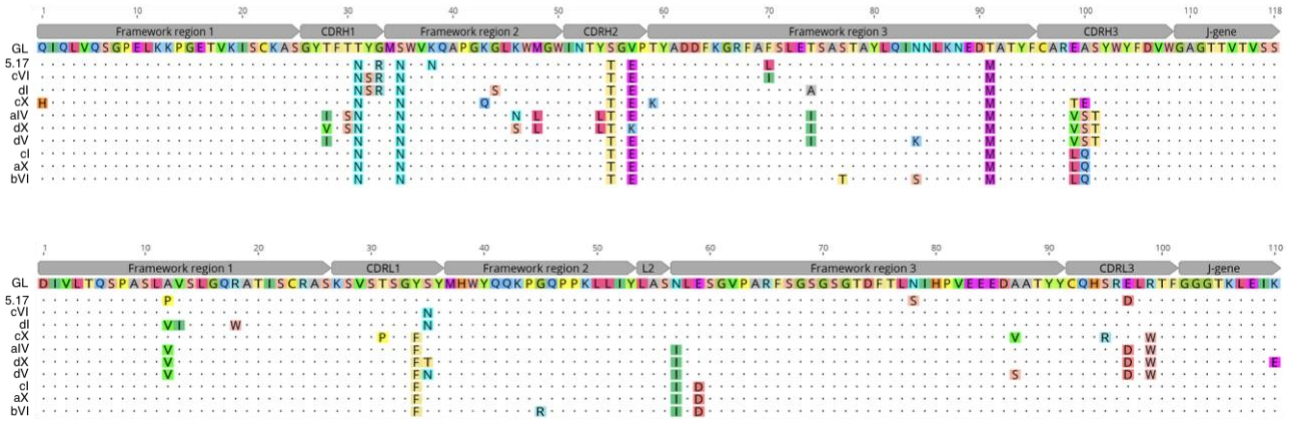

**Extended Data Figure 17. Characteristics of tested clones shown in Fig. 3e-g. a.** Characteristics of tested clones. Differences in CDR3 amino acid sequence are indicated in red. **b.** Heavy (top) and light-chain (bottom) amino acid sequence alignment of tested clones. Sequence disagreements to germline are highlighted.

**A**

| ID | Mouse | # cells | V <sub>H</sub> | CDRH3         | V <sub>L</sub> | CDRL3       | nt dist. (aa-changes) | K <sub>D</sub> <sup>APP</sup> [nM] |
|----|-------|---------|----------------|---------------|----------------|-------------|-----------------------|------------------------------------|
| 19 | 5     | 1       | IGHV1-15       | CARGGYGSFAYW  | IGKV4-57-1     | CQQFTSSPPTF | 22 nt (14)            |                                    |
| 20 | 1     | 3       | IGHV1-82       | CARSGYGTGFAYW | IGKV4-55       | CQQWNSYPWTF | 19 nt (6)             | n.d.                               |
| 21 | 4     | 3       | IGHV5-12       | CARHGYGALAYW  | IGKV4-50       | CQQFTSLPPTF | 14 nt (7)             | 8.9 ± 0.6                          |
| 22 | 4     | 10      | IGHV1-53       | CTRGGYGGFAYW  | IGKV4-61       | CQQYHSYPWTF | 29 nt (14)            | 11.7 ± 1.3                         |

**B**

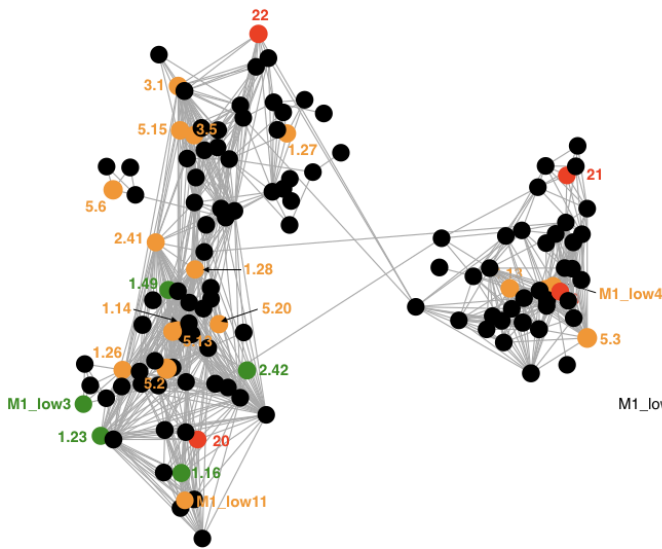

■ Not tested  
 ■ Binder  
 ■ No binder  
 ■ Chosen clones

**C**

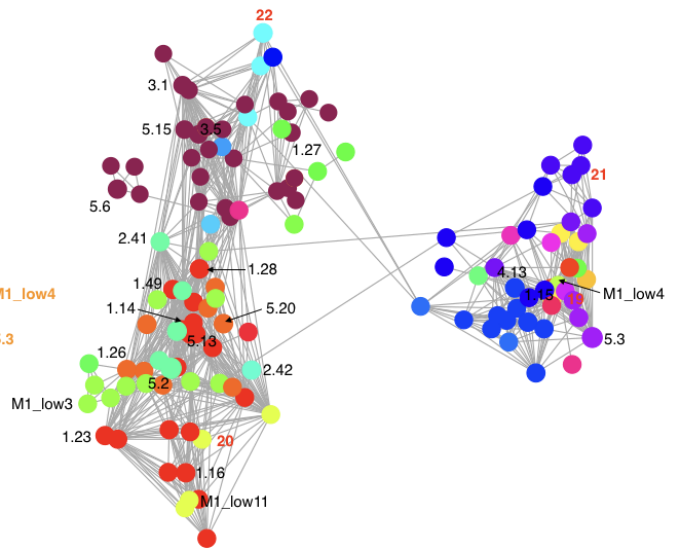

■ IGHV1-4/IGKV4-50    ■ IGHV1-15/IGKV6-32    ■ IGHV1-39/IGKV4-50    ■ IGHV1-55/IGKV4-61  
 ■ IGHV1-4/IGKV4-59    ■ IGHV1-18/IGKV3-2    ■ IGHV1-42/IGKV4-50    ■ IGHV1-61/IGKV4-50  
 ■ IGHV1-5/IGKV4-50    ■ IGHV1-18/IGKV4-50    ■ IGHV1-52/IGKV4-50    ■ IGHV1-64/IGKV4-61  
 ■ IGHV1-9/IGKV4-50    ■ IGHV1-18/IGKV4-55    ■ IGHV1-53/IGKV4-50    ■ IGHV1-80/IGKV4-50  
 ■ IGHV1-9/IGKV4-55    ■ IGHV1-18/IGKV4-61    ■ IGHV1-53/IGKV4-61    ■ IGHV1-80/IGKV4-55  
 ■ IGHV1-9/IGKV4-61    ■ IGHV1-19/IGKV4-55    ■ IGHV1-54/IGKV4-50    ■ IGHV1-82/IGKV4-55  
 ■ IGHV1-9/IGKV6-13    ■ IGHV1-26/IGKV4-55    ■ IGHV1-54/IGKV4-61    ■ IGHV1-84/IGKV4-50  
 ■ IGHV1-15/IGKV4-57-1    ■ IGHV1-34/IGKV4-50    ■ IGHV1-54/IGKV10-94    ■ IGHV5-12/IGKV4-50

**Extended Data Figure 18. Characteristics of tested clones shown in Fig. 3h-j. a.** Characteristics of tested clones. **b.** Subnetwork plot of connected IgG clones from all mice shown in **Extended Data Fig. 9**. Edges represent clones separated by edit distance of three or less based on the concatenated CDR3 aa sequence. Binders, non-binders, not tested clones as well as newly chosen clones are shown in orange, green, black and red respectively. Indicated clone ID according to **Extended Data Table 1** and **2**. **c.** Identical network plot as in **b**. Color code indicates differential V<sub>H</sub>-V<sub>L</sub> gene usage as indicated.

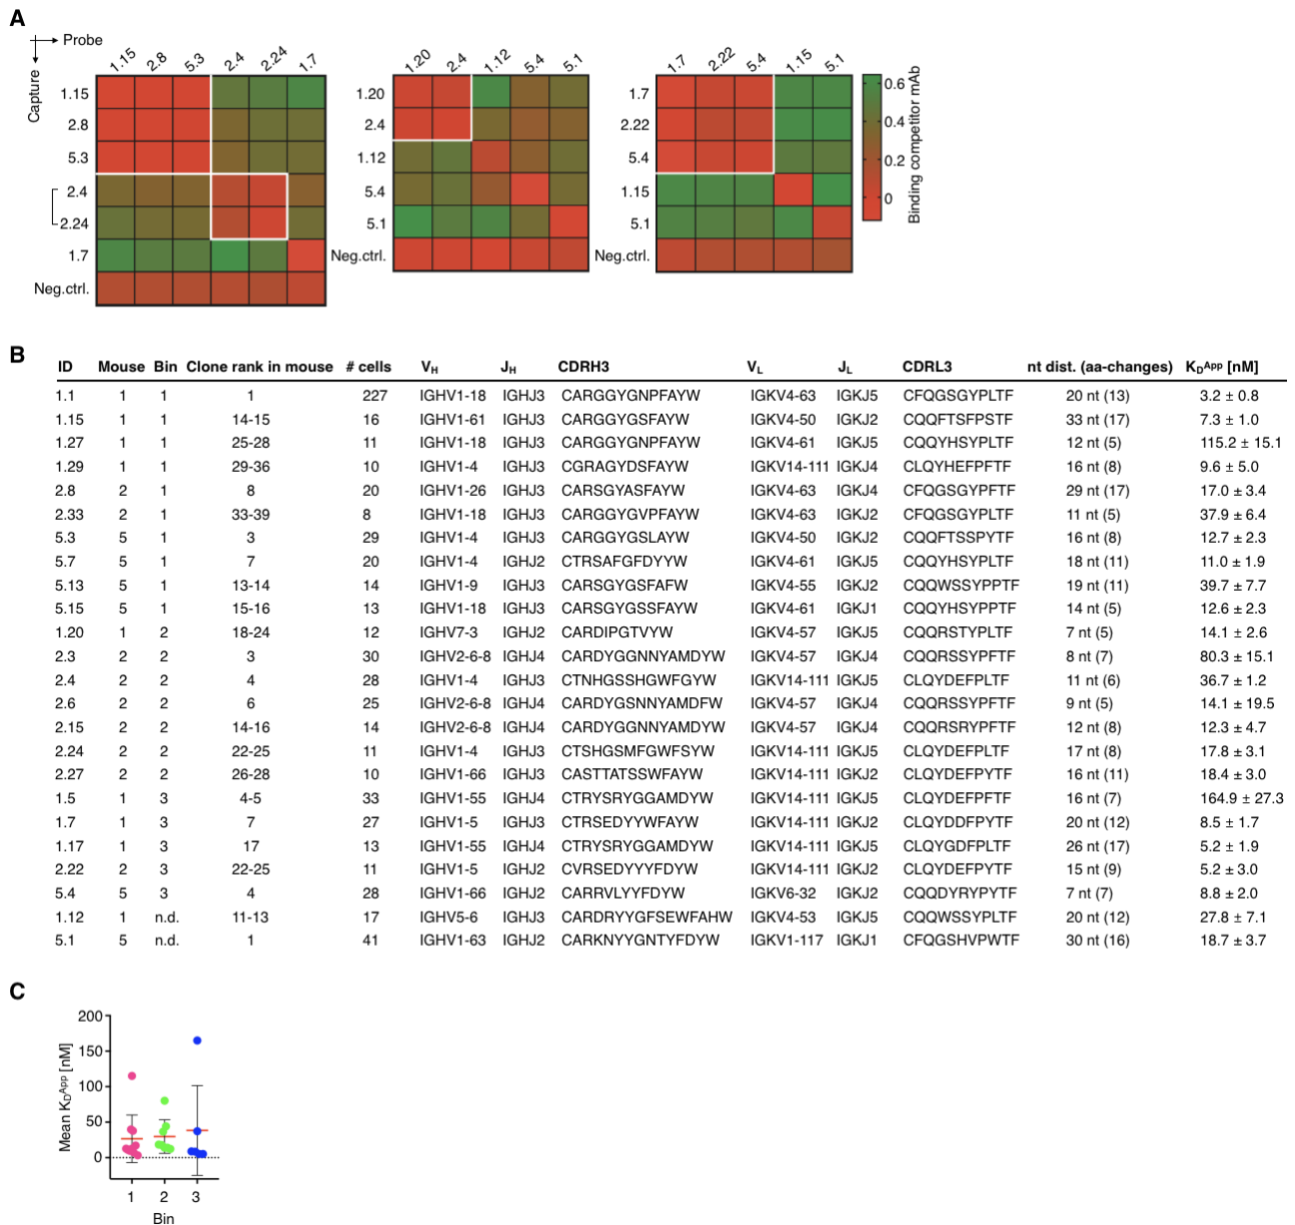

**Extended Data Figure 19. Cross-competition epitope binning between clones from different mice. a.** Heatmaps show competitive antigen binding between top expanded, bin specific (according to **Fig. 4b**) clones from different mice. Antibodies indicated on the left were captured and probe antibodies on top were used to determine cross-competition for epitope access. Red indicates no binding of the probe antibody as a consequence of epitope blocking by the capture antibody, whereas green denotes binding of the competitor antibody. Groups of antibodies that target the same epitope (epitope bins) are highlighted in white squares. Brackets indicate clonal variants that share the same V<sub>H</sub>/V<sub>L</sub> as well as CDR3 length and only differ in their CDR3 amino acid sequence. An anti-RSVF capture antibody, which does not bind the antigen was used as negative control for all experiments. Clone ID according to **Extended Data Table 1**. **b.** Characteristics of bin-specific clones. **c** Apparent dissociation constant (K<sub>D</sub><sup>APP</sup>) for binders separated by epitope bin.

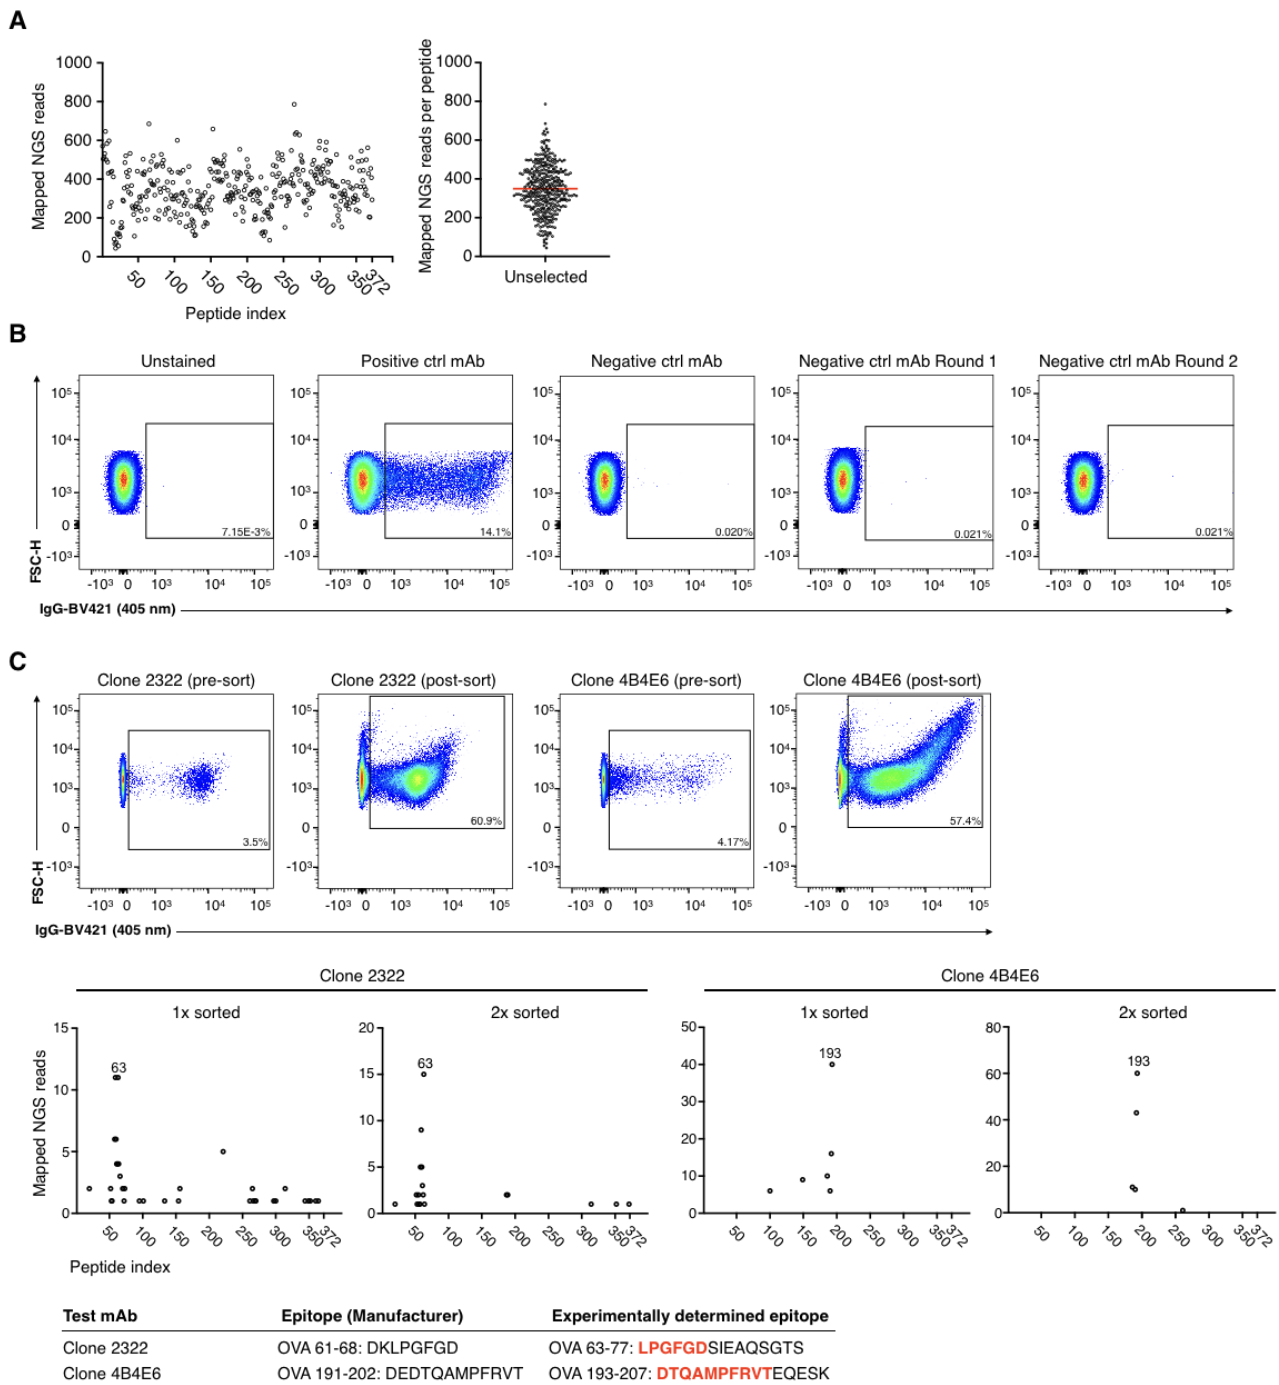

**Extended Data Figure 20. Establishment of a bacterial peptide display workflow for linear epitope mapping.** **a.** Quality control of the unselected cloned OVA epitope library by NGS. All 372 peptide 15-mer windows (one amino acid offset) were observed (left) at comparable frequencies (right). Mean window occurrence for the respective NGS run is indicated in red. **b.** Flow cytometry dot plots show that secondary FACS antibody does not lead to unspecific enrichment after two rounds of enrichment. Unstained denotes no primary antibody. Positive and negative control primary mAb used were OVA specific mAb Clone 2322 (Chondrex, 7094) and an inhouse RSVF specific mouse IgG. **c.** Assay establishment with two OVA specific antibodies with known epitope specificity. Top: FACS dot plots show FACS enrichment of cells binding to commercial antibodies Clone 2322 (Chondrex, 7094) (left) and Clone 4B4E6 (Chondrex, 7096) (right). Middle: NGS results after one and two rounds of FACS enrichment. Bottom: experimentally determined epitope identity compared to epitope information provided by the manufacturer. Epitope overlap is indicated in bold red.

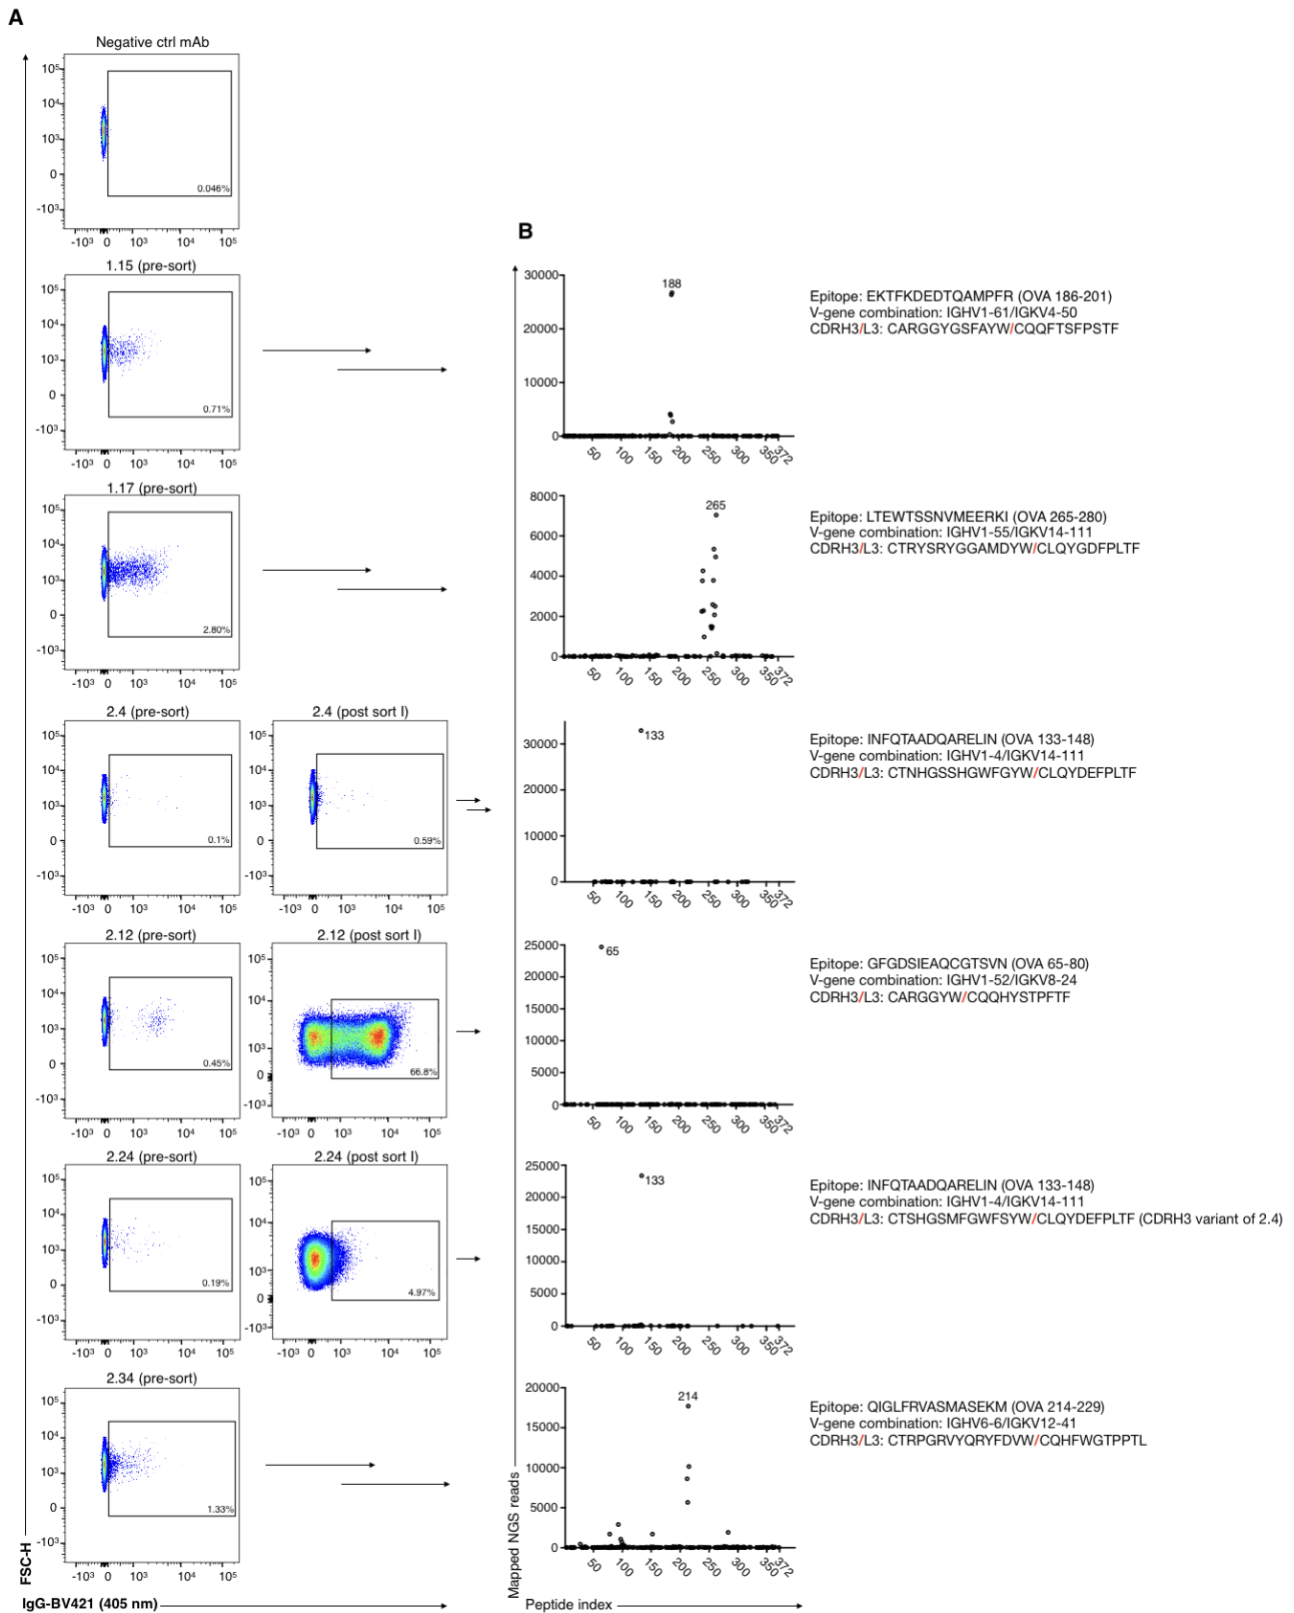

**Extended Data Figure 21. Epitope mapping results of clones with linear epitope specificity as shown in Fig. 4e. a.** Flow cytometry dot plots indicate FACS enrichment of positive clones for each antibody. **b.** Deep sequencing results of positive FACS output and epitope assignment for each antibody. Numbers correspond to the peptide index that was enriched the most. Only peptides with one or more occurrences are shown.

| ID       | Mouse | IgG clone rank in mouse | # cells | V <sub>H</sub> | CDRH3             | V <sub>L</sub> | CDRL3        | nt dist. (aa-changes) | K <sub>D</sub> <sup>APP</sup> [nM] |
|----------|-------|-------------------------|---------|----------------|-------------------|----------------|--------------|-----------------------|------------------------------------|
| 1.1      | 1     | 1                       | 227     | IGHV1-18       | CARGGYGNPFAYW     | IGKV4-63       | CFQGSYPLTF   | 20 nt (13)            | 3.2 ± 0.8                          |
| 1.5      | 1     | 4-5                     | 33      | IGHV1-55       | CTRYSTRYGGAMDYW   | IGKV14-111     | CLQYDEFFPFTF | 16 nt (7)             | 164.9 ± 27.3                       |
| 1.7      | 1     | 7                       | 27      | IGHV1-5        | CTRSEDIYWFAYW     | IGKV14-111     | CLQYDDFPYTF  | 20 nt (12)            | 8.5 ± 1.7                          |
| 1.11     | 1     | 11-13                   | 17      | IGHV1-74       | CVLRLFYAMDYW      | IGKV6-17       | CQQFYNTPWTF  | 27 nt (15)            | n.d.                               |
| 1.12     | 1     | 11-13                   | 17      | IGHV5-6        | CARDRYYGFSEWFAHW  | IGKV4-53       | CQQWSSYPLTF  | 20 nt (12)            | 27.8 ± 7.1                         |
| 1.14     | 1     | 14-15                   | 16      | IGHV1-80       | CARSGYGVFAFW      | IGKV4-55       | CQQWSSYPPTF  | 21 nt (8)             | 179.6 ± 2.6                        |
| 1.15     | 1     | 14-15                   | 16      | IGHV1-61       | CARGGYGSFAYW      | IGKV4-50       | CQQFTSFPSTF  | 33 nt (17)            | 7.3 ± 1.0                          |
| 1.17     | 1     | 17                      | 13      | IGHV1-55       | CTRYSTRYGGAMDYW   | IGKV14-111     | CLQYGDFFLTF  | 26 nt (17)            | 5.2 ± 1.9                          |
| 1.20     | 1     | 18-24                   | 12      | IGHV7-3        | CARDIPGTVYW       | IGKV4-57       | CQQRSTYPLTF  | 7 nt (5)              | 14.1 ± 2.6                         |
| 1.26     | 1     | 25-28                   | 11      | IGHV1-26       | CARSGYATAFAYW     | IGKV4-55       | CQQWSSYPLTF  | 23 nt (15)            | 1.4 ± 1.6                          |
| 1.27     | 1     | 25-28                   | 11      | IGHV1-18       | CARGGYGNPFAYW     | IGKV4-61       | CQQYHSYPLTF  | 12 nt (5)             | 115.2 ± 15.1                       |
| 1.28     | 1     | 25-28                   | 11      | IGHV1-80       | CARSGYGAFAYW      | IGKV4-55       | CQQWSSYPPTF  | 25 nt (10)            | 148.4 ± 34.2                       |
| 1.29     | 1     | 29-36                   | 10      | IGHV1-4        | CGRAGYDSFAYW      | IGKV14-111     | CLQYHEFFPFTF | 16 nt (8)             | 9.6 ± 5.0                          |
| 1.32     | 1     | 29-36                   | 10      | IGHV1-4        | CARPFYDYYRRGAMDYW | IGKV3-10       | CQQNEDPPTF   | 16 nt (8)             | n.d.                               |
| 1.40     | 1     | 40-46                   | 8       | IGHV1-76       | CARSELQNFVMDYW    | IGKV3-7        | CQHSWEIPWTF  | 36 nt (17)            | 15.2 ± 2.3                         |
| 1.42     | 1     | 40-46                   | 8       | IGHV8-12       | CARRDGIITAWYFDVW  | IGKV3-5        | CQQSNEDPLTF  | 9 nt (4)              | n.d.                               |
| 1.43     | 1     | 40-46                   | 8       | IGHV1-64       | CARNEYDGVFAYW     | IGKV3-12       | CQHSRELPWTF  | 22 nt (12)            | n.d.                               |
| 1.48     | 1     | 47-52                   | 7       | IGHV2-3        | CAKEDYYGSSWGLDYW  | IGKV12-98      | CQQLYSTPYTF  | 2 nt (2)              | n.d.                               |
| 1.52     | 1     | 47-52                   | 7       | IGHV3-6        | CARGGYVMDYW       | IGKV10-94      | CQQYSKIPYTF  | 8 nt (5)              | 71.2 ± 70.2                        |
| 1.53     | 1     | 53-63                   | 6       | IGHV9-3        | CTRRGGNYVYVYAMDYW | IGKV1-110      | CSQSTHVPPTF  | 2 nt (3)              | 61.8 ± 9.0                         |
| 1.55     | 1     | 53-63                   | 6       | IGHV1-64       | CARLGVYW          | IGKV15-103     | CQQGSSYPPTF  | 16 nt (6)             | 10.0 ± 10.6                        |
| M1_low1  | 1     | 68-96                   | 5       | IGHV8-12       | CARADWITTPDYW     | IGKV6-23       | CQQYSTYPWTF  | 14 nt (4)             | n.d.                               |
| M1_low4  | 1     | 138-189                 | 3       | IGHV1-39       | CARSGYGTFAFW      | IGKV4-50       | CQQFTSSPSTF  | 25 nt (13)            | n.d.                               |
| M1_low8  | 1     | 249-404                 | 1       | IGHV5-9-1      | CAGDRYDGYAMDYW    | IGKV4-57       | CQQRSSYPWTF  | 12 nt (11)            | 183.6 ± 11.0                       |
| M1_low11 | 1     | 249-404                 | 1       | IGHV7-3        | CARDKGDSEWFDYW    | IGKV12-98      | CQQLYNTPYTF  | 19 nt (7)             | 363.0 ± 8.0                        |
| M1_low13 | 1     | 249-404                 | 1       | IGHV9-3        | CARSNGNYLFAFW     | IGKV4-55       | CQQWSSYPPITF | 6 nt (4)              | 167.5 ± 3.4                        |
| 2.1      | 2     | 1                       | 55      | IGHV5-6        | CARRGGYGFYFDYW    | IGLV1          | CALWYNSHLVF  | 7 nt (4)              | n.d.                               |
| 2.3      | 2     | 3                       | 30      | IGHV2-6-8      | CARDYGGNNYAMDYW   | IGKV4-57       | CQQRSSYPPTF  | 8 nt (7)              | 80.3 ± 15.1                        |
| 2.4      | 2     | 4                       | 28      | IGHV1-4        | CTNHGSSHGWFYW     | IGKV14-111     | CLQYDEFPLTF  | 11 nt (6)             | 36.7 ± 1.2                         |
| 2.6      | 2     | 6                       | 25      | IGHV2-6-8      | CARDYGSNNYAMDFW   | IGKV4-57       | CQQRSSYPPTF  | 9 nt (5)              | 14.1 ± 19.5                        |
| 2.7      | 2     | 7                       | 24      | IGHV1-76       | CARYGYEYGFYDW     | IGKV3-7        | CQHSWEIPYTF  | 29 nt (15)            | n.d.                               |
| 2.8      | 2     | 8                       | 20      | IGHV1-26       | CARSGYASFAFW      | IGKV4-63       | CFQGSYPPFTF  | 29 nt (17)            | 17.0 ± 3.4                         |
| 2.9      | 2     | 9                       | 19      | IGHV1-69       | CARCLYYSSSCAMDYW  | IGKV5-43       | CQQSNSWPLTF  | 36 nt (15)            | n.d.                               |
| 2.12     | 2     | 12-13                   | 15      | IGHV1-52       | CARGGYW           | IGKV8-24       | CQQHYSTPPTF  | 14 nt (5)             | 77.2 ± 27.9                        |
| 2.15     | 2     | 14-16                   | 14      | IGHV2-6-8      | CARDYGGNNYAMDYW   | IGKV4-57       | CQQRSSYPPTF  | 12 nt (8)             | 12.3 ± 4.7                         |
| 2.18     | 2     | 17-18                   | 13      | IGHV1-55       | CTRSRQYFYLVDW     | IGKV14-111     | CLQYDEFFPYTF | 15 nt (8)             | 180.2 ± 121.2                      |
| 2.22     | 2     | 22-25                   | 11      | IGHV1-5        | CVRSEDIYFFDYW     | IGKV14-111     | CLQYDEFFPYTF | 15 nt (9)             | 5.2 ± 3.0                          |
| 2.24     | 2     | 22-25                   | 11      | IGHV1-4        | CTSHGSMFGWFSYW    | IGKV14-111     | CLQYDEFPLTF  | 17 nt (8)             | 17.8 ± 3.1                         |
| 2.27     | 2     | 26-28                   | 10      | IGHV1-66       | CASITATSSWFAFW    | IGKV14-111     | CLQYDEFFPYTF | 16 nt (11)            | 18.4 ± 3.0                         |
| 2.33     | 2     | 33-39                   | 8       | IGHV1-18       | CARGGYGVPFAYW     | IGKV4-63       | CFQGSYPLTF   | 11 nt (5)             | 37.9 ± 6.4                         |
| 2.34     | 2     | 33-39                   | 8       | IGHV6-6        | CTRPGRVYQRYFDVW   | IGKV12-41      | CQHFVGTPTPL  | 17 nt (7)             | 37.3 ± 10.6                        |
| 2.39     | 2     | 33-39                   | 8       | IGHV1-55       | CTRSRQYFVFDVW     | IGKV14-111     | CLQYDEFFPYTF | 11 nt (6)             | 80.3 ± 17.0                        |
| 2.40     | 2     | 40-48                   | 7       | IGHV1-4        | CTSHASMYGWFSYW    | IGKV14-111     | CLQYDEFPLTF  | 23 nt (14)            | 9.9 ± 2.1                          |
| 2.41     | 2     | 40-48                   | 7       | IGHV1-9        | CARSGYGSFAFW      | IGKV4-55       | CQQWSSYPPTF  | 22 nt (15)            | 10.9 ± 1.9                         |
| 2.45     | 2     | 40-48                   | 7       | IGHV1-34       | CAREYEAFFAYW      | IGKV10-96      | CQQGNTLPWTF  | 1 nt (1)              | n.d.                               |
| 2.49     | 2     | 49-56                   | 6       | IGHV1-5        | CTRSEDIYFFDYW     | IGKV14-111     | CLQYDEFFPYTF | 13 nt (11)            | 7.4 ± 1.5                          |
| 2.51     | 2     | 49-56                   | 6       | IGHV1-5        | CTRSEGYFFDYW      | IGKV14-111     | CQQYDEFPYTF  | 18 nt (12)            | 12.1 ± 2.1                         |
| 2.55     | 2     | 49-56                   | 6       | IGHV2-6-8      | CARDYGSNDYALDFW   | IGKV4-57       | CQQRSSYPPTF  | 14 nt (7)             | 3.6 ± 6.0                          |
| 5.1      | 5     | 1                       | 41      | IGHV1-63       | CARKNYGNTYFDYW    | IGKV1-117      | CFQGSHPWTF   | 30 nt (16)            | 18.7 ± 3.7                         |
| 5.2      | 5     | 2                       | 34      | IGHV1-9        | CARSGYGTFAFW      | IGKV4-55       | CQQWSSYPPPTF | 21 nt (12)            | 451.8 ± 161.9                      |
| 5.3      | 5     | 3                       | 29      | IGHV1-4        | CARGGYGSLAYW      | IGKV4-50       | CQQFTSSPYTF  | 16 nt (8)             | 12.7 ± 2.3                         |
| 5.4      | 5     | 4                       | 28      | IGHV1-66       | CARRVLYFFDYW      | IGKV6-32       | CQQDYRYPYTF  | 7 nt (7)              | 8.8 ± 2.0                          |
| 5.5      | 5     | 5-6                     | 24      | IGHV1-18       | CARTNWDYFFDYW     | IGKV14-111     | CLQYDEFFWTF  | 22 nt (13)            | n.d.                               |
| 5.6      | 5     | 5-6                     | 24      | IGHV1-18       | CARSGYDFFAFW      | IGKV4-61       | CQQCHSFPLTF  | 29 nt (18)            | 61.1 ± 30.5                        |
| 5.7      | 5     | 7                       | 20      | IGHV1-4        | CTRSAGFDYW        | IGKV4-61       | CQQYHSYPLTF  | 18 nt (11)            | 11.0 ± 1.9                         |
| 5.12     | 5     | 12                      | 15      | IGHV8-12       | CVRRPLGISDGYFFYW  | IGKV6-23       | CQQYSSFPLTF  | 16 nt (8)             | n.d.                               |
| 5.13     | 5     | 13-14                   | 14      | IGHV1-9        | CARSGYGSFAFW      | IGKV4-55       | CQQWSSYPPPTF | 19 nt (11)            | 39.7 ± 7.7                         |
| 5.14     | 5     | 13-14                   | 14      | IGHV1-63       | CARKIYYGTYFDYW    | IGKV1-117      | CFQGSHPWTF   | 18 nt (8)             | 44.2 ± 5.9                         |
| 5.15     | 5     | 15-16                   | 13      | IGHV1-18       | CARSGYGSFAFW      | IGKV4-61       | CQQYHSYPPPTF | 14 nt (5)             | 12.6 ± 2.3                         |
| 5.16     | 5     | 15-16                   | 13      | IGHV9-3        | CARLQSYWYFDVW     | IGKV3-12       | CQHSRELRFT   | 7 nt (6)              | 5.0 ± 1.3                          |
| 5.17     | 5     | 17-18                   | 12      | IGHV9-3        | CAREASYWYFDVW     | IGKV3-12       | CQHSRDLRFT   | 8 nt (6)              | 20.2 ± 2.0                         |
| 5.18     | 5     | 17-18                   | 12      | IGHV1-4        | CTRSAYGYDYW       | IGKV4-61       | CQQYHSYPLTF  | 11 nt (4)             | 11.8 ± 2.0                         |
| 5.20     | 5     | 19-21                   | 11      | IGHV1-26       | CARSLGLAFAYW      | IGKV4-55       | CQQWSSYPPITF | 27 nt (15)            | 35.2 ± 6.2                         |
| 5.25     | 5     | 25-28                   | 9       | IGHV5-6        | CARDPGLYGKAYFSYW  | IGKV3-12       | CQHSRELPFTF  | 8 nt (2)              | 5.9 ± 5.4                          |
| 5.29     | 5     | 29-38                   | 8       | IGHV1-22       | CAREGLRENYAMDYW   | IGKV6-23       | CQQFTNYPYTF  | 23 nt (15)            | n.d.                               |
| 5.33     | 5     | 29-38                   | 8       | IGHV2-3        | CAKLDYGSLLYAVDLW  | IGKV13-85      | CQQYWSPTYTF  | 11 nt (4)             | 27.7 ± 4.2                         |
| 5.37     | 5     | 29-38                   | 8       | IGHV1-4        | CTRSAYGFDYW       | IGKV4-61       | CQQYYSYPLTF  | 14 nt (6)             | 4.6 ± 0.9                          |
| 5.38     | 5     | 29-38                   | 8       | IGHV1-76       | CARWGDSSGTGAMDYW  | IGKV3-7        | CQHSWEFPLTY  | 36 nt (15)            | 20.0 ± 3.7                         |
| 5.41     | 5     | 39-48                   | 7       | IGHV2-3        | CAKFSYGSYYAIDYW   | IGKV12-41      | CQHFWRTPYTF  | 16 nt (11)            | 34.0 ± 3.1                         |
| 5.44     | 5     | 39-48                   | 7       | IGHV5-9-1      | CSRYQGYGSSPYFDYW  | IGKV3-12       | CQHSRELPFTF  | 9 nt (7)              | n.d.                               |
| 5.50     | 5     | 49-54                   | 6       | IGHV14-1       | CTRSYAAWFPYW      | IGKV4-74       | CHQYHRSPLTF  | 10 nt (7)             | n.d.                               |
| 5.51     | 5     | 49-54                   | 6       | IGHV5-9-1      | CAREGLYGNVAMDYW   | IGKV13-84      | CQQYWSPTPLTF | 4 nt (3)              | n.d.                               |
| 3.1      | 3     | 1                       | 21      | IGHV1-18       | CTRSYGSFAFW       | IGKV4-61       | CQQYHSYPPPTF | 23 nt (15)            | n.d.                               |
| 3.2      | 3     | 2-3                     | 14      | IGHV1-5        | CTRSDDYFFDYW      | IGKV14-111     | CLQYDEFFPYTF | 12 nt (9)             | n.d.                               |
| 3.5      | 3     | 5                       | 12      | IGHV1-18       | CVRSGYGSFAFW      | IGKV4-61       | CQQYHSYPPPTF | 15 nt (7)             | n.d.                               |
| 4.1      | 4     | 1                       | 45      | IGHV1-76       | CARAIYNDTTGAFYEW  | IGKV3-7        | CHHSWEIPYTF  | 35 nt (13)            | n.d.                               |
| 4.2      | 4     | 2                       | 43      | IGHV1-19       | CARIYRGKAMDYW     | IGKV3-2        | CQQSKEVPYTF  | 14 nt (8)             | n.d.                               |
| 4.8      | 4     | 8                       | 18      | IGHV1-53       | CTRFYDYGGDAYW     | IGKV4-57       | CHQRSYPRFT   | 21 nt (11)            | n.d.                               |
| 4.11     | 4     | 11                      | 14      | IGHV1-64       | CTRTGGTWGAMDYW    | IGKV8-24       | CQQHYSTPPTF  | 15 nt (6)             | n.d.                               |
| 4.13     | 4     | 13                      | 13      | IGHV1-5        | CIRSGYGSFAFW      | IGKV4-50       | CQQFTSFPYTF  | 16 nt (11)            | n.d.                               |

**Extended Data Table 1. Overview and characteristics of OVA binders.** Clone ID corresponds to mouse number followed by clone index number corresponding to Fig. 1g.

| ID       | Mouse | IgG clone rank in mouse | # cells | V <sub>H</sub> | CDRH3               | V <sub>L</sub> | CDRL3        | nt dist. (aa-changes) |
|----------|-------|-------------------------|---------|----------------|---------------------|----------------|--------------|-----------------------|
| 1.6      | 1     | 6                       | 31      | IGHV5-9-1      | CTGDRYDGYAMDYD      | IGKV4-57       | CQQRSSYPWTF  | 6 nt (4)              |
| 1.8      | 1     | 8                       | 22      | IGHV10-1       | CVRQGGKIYDYDYFDYD   | IGKV17-127     | CLQSDNMPYTF  | 4 nt (2)              |
| 1.9      | 1     | 9-10                    | 18      | IGHV9-3        | CTRGGNYYYVYAMDYD    | IGKV14-111     | CLQYDELYTF   | 4 nt (4)              |
| 1.10     | 1     | 9-10                    | 18      | IGHV9-3        | CARSDGNLYFAYW       | IGKV4-55       | CQWSSYPPTF   | 4 nt (1)              |
| 1.13     | 1     | 11-13                   | 17      | IGHV1-34       | CARSLYDGYPHFDYD     | IGKV4-50       | CQQTSSPPTF   | 11 nt (8)             |
| 1.16     | 1     | 16                      | 14      | IGHV1-80       | CARSGYGTGFAYW       | IGKV4-55       | CQWNSYPWTF   | 19 nt (6)             |
| 1.18     | 1     | 18-24                   | 12      | IGHV1-5        | CTRSDSNFYFDYD       | IGKV14-111     | CLQYDEFPYTF  | 11 nt (7)             |
| 1.19     | 1     | 18-24                   | 12      | IGHV5-6        | CARYDNYVRVAMDYD     | IGKV4-74       | CHQYHRSPYTF  | 18 nt (7)             |
| 1.21     | 1     | 18-24                   | 12      | IGHV13-2       | CSRAFHYDYDYGMDYD    | IGKV9-124      | CLQYASYPWTF  | 13 nt (9)             |
| 1.23     | 1     | 18-24                   | 12      | IGHV1-80       | CARSGYGTGFAYW       | IGKV4-55       | CQWSSYPWTF   | 18 nt (6)             |
| 1.25     | 1     | 25-28                   | 11      | IGHV5-6        | CARQGGYGYSPYFDYD    | IGKV6-15       | CQQYNSYPLTF  | 11 nt (6)             |
| 1.30     | 1     | 29-36                   | 10      | IGHV1-4        | CAVRRENYAMEYD       | IGKV4-79       | CHQWSSFPPTF  | 24 nt (15)            |
| 1.31     | 1     | 29-36                   | 10      | IGHV7-3        | CARDIPYAMDYD        | IGKV1-135      | CWQGTTHFPPTF | 5 nt (0)              |
| 1.33     | 1     | 29-36                   | 10      | IGHV1-4        | CARGFGLYFDYD        | IGKV4-57       | CHQRSSYPPTF  | 28 nt (19)            |
| 1.37     | 1     | 37-39                   | 9       | IGHV1-5        | CARTGTHWYFDVW       | IGKV3-5        | CQSNEDPWTF   | 19 nt (10)            |
| 1.38     | 1     | 37-39                   | 9       | IGHV14-3       | CVRFGAVPRFSYD       | IGKV1-117      | CFQGSHPVPTF  | 18 nt (9)             |
| 1.39     | 1     | 37-39                   | 9       | IGHV5-6        | CAKDIGYGYGWFYD      | IGKV4-61       | CQQYHSPPTF   | 14 nt (10)            |
| 1.41     | 1     | 40-46                   | 8       | IGHV14-1       | CCFFYGYGAWFGYD      | IGKV6-17       | CQQHYTSPRTF  | 19 nt (11)            |
| 1.44     | 1     | 40-46                   | 8       | IGHV9-3        | CARRGGNYYYVAVDYD    | IGKV14-111     | CLQYDELYTF   | 8 nt (5)              |
| 1.47     | 1     | 47-52                   | 7       | IGHV5-17       | CARQNDYD            | IGKV12-44      | CQHHYGTPLTF  | 18 nt (8)             |
| 1.49     | 1     | 47-52                   | 7       | IGHV1-80       | CARSGYGVFAYD        | IGKV4-55       | CQWSSYPPTF   | 32 nt (13)            |
| 1.50     | 1     | 47-52                   | 7       | IGHV1-18       | CGRGGYGNPFAYD       | IGKV4-63       | CFQGSYPLTF   | 23 nt (16)            |
| 1.51     | 1     | 47-52                   | 7       | IGHV9-3        | CARSPTWFAYD         | IGKV15-103     | CQQGQSFYTF   | 12 nt (9)             |
| 1.54     | 1     | 53-63                   | 6       | IGHV1-4        | CARKSNLFPYD         | IGKV6-20       | CQGTYSYPPTF  | 16 nt (6)             |
| 1.56     | 1     | 53-63                   | 6       | IGHV1-26       | CGRSYGYSYAMDYD      | IGKV16-104     | CQHNHEYPTF   | 25 nt (15)            |
| 1.57     | 1     | 53-63                   | 6       | IGHV5-17       | CARSYGSSLDYD        | IGKV12-41      | CQHFWSPTPTF  | 19 nt (8)             |
| M1_low2  | 1     | 97-137                  | 4       | IGHV1-4        | CARDYDGFAYD         | IGKV1-110      | CQQTSSPSTF   | 21 nt (13)            |
| M1_low3  | 1     | 97-137                  | 4       | IGHV1-18       | CARSGYATAFAYD       | IGKV4-55       | CQQGNTLLMYTF | 26 nt (13)            |
| M1_low5  | 1     | 190-248                 | 2       | IGHV1-26       | CARYGNYYFDYD        | IGKV10-96      | CLQYASSPLTF  | 19 nt (12)            |
| M1_low6  | 1     | 249-404                 | 1       | IGHV1-19       | CARRGDSYSQFPYAMDYD  | IGKV1-110      | CQQRSSYPWTF  | 9 nt (6)              |
| M1_low7  | 1     | 249-404                 | 1       | IGHV1-26       | CARSTAIYGMIDYD      | IGKV9-120      | CHQRSSYPSTF  | 30 nt (15)            |
| M1_low9  | 1     | 249-404                 | 1       | IGHV8-11       | CARIEGLLAWFGYD      | IGKV1-110      | CSQSTHVPWTF  | 22 nt (8)             |
| M1_low10 | 1     | 249-404                 | 1       | IGHV1-82       | CARAGYGTGFAYD       | IGKV4-55       | CQQWSTYPWTF  | 14 nt (8)             |
| M1_low12 | 1     | 249-404                 | 1       | IGHV1-4        | CVRSDDGYGYVPRWFGYD  | IGKV8-27       | CHQYLSSYTF   | 29 nt (17)            |
| M1_low14 | 1     | 249-404                 | 1       | IGHV5-9-1      | CQRLRGYFDVW         | IGKV1-110      | CSQSTHVPYTF  | 20 nt (9)             |
| M1_low15 | 1     | 249-404                 | 1       | IGHV13-2       | CSRSFYDYDYAMDYD     | IGKV9-124      | CLQYASYPWTF  | 5 nt (2)              |
| 2.2      | 2     | 2                       | 32      | IGHV2-6-8      | CARDYGANNYAMDYD     | IGKV4-57       | CQQRSSYPPTF  | 14 nt (8)             |
| 2.5      | 2     | 5                       | 27      | IGHV7-3        | CARDMNNGSYWLVDVW    | IGKV12-89      | CQNVLYSPWTF  | 16 nt (8)             |
| 2.10     | 2     | 10                      | 18      | IGHV1-26       | CARNPYD             | IGKV1-117      | CFQGSHPVPLTF | 26 nt (8)             |
| 2.11     | 2     | 11                      | 16      | IGHV1-19       | CASQLGSWFAYD        | IGKV14-111     | CLQYDEFPYTF  | 14 nt (5)             |
| 2.13     | 2     | 12-13                   | 15      | IGHV1-9        | CARSGGFYDPGRGYAMDYD | IGKV4-74       | CHQYYRSPRTF  | 32 nt (17)            |
| 2.14     | 2     | 14-16                   | 14      | IGHV8-12       | CARSYADFYD          | IGKV4-80       | CHQWSSYPPTF  | 9 nt (4)              |
| 2.16     | 2     | 14-16                   | 14      | IGHV1-55       | CTRSLRYWYLDVW       | IGKV14-111     | CLQYDEFPYTF  | 19 nt (10)            |
| 2.17     | 2     | 17-18                   | 13      | IGHV9-3        | CATPDYFAMDYD        | IGKV8-21       | CKQSYLPLWTF  | 9 nt (6)              |
| 2.19     | 2     | 19-21                   | 12      | IGHV1-5        | CTRSEGYDYFDYD       | IGKV14-111     | CLQYDEFPYTF  | 19 nt (14)            |
| 2.20     | 2     | 19-21                   | 12      | IGHV5-6        | CTRRDFYGYAMDYD      | IGKV8-28       | CQNDHSPYPTF  | 13 nt (5)             |
| 2.23     | 2     | 22-25                   | 11      | IGHV6-6        | CTRRDFWYD           | IGKV1-135      | CWQGTTHFPQTF | 13 nt (11)            |
| 2.26     | 2     | 26-28                   | 10      | IGHV5-6        | CARRGGYGYGYFDYD     | IGLV1          | CALWYSNHLVTF | 11 nt (6)             |
| 2.28     | 2     | 26-28                   | 10      | IGHV8-8        | CARDLYDDGTAIFYD     | IGKV8-27       | CHQYLSSRSF   | 23 nt (8)             |
| 2.29     | 2     | 29-32                   | 9       | IGHV14-1       | CTPYDYDVSFAFYD      | IGKV12-44      | CQHHGSPRTF   | 13 nt (10)            |
| 2.30     | 2     | 29-32                   | 9       | IGHV1-39       | CARWGEIYPYAMDYD     | IGKV10-96      | CQQGNTFPWTF  | 25 nt (13)            |
| 2.31     | 2     | 29-32                   | 9       | IGHV1-5        | CTRCYGNPFYD         | IGKV4-74       | CHQHRSPPPTF  | 28 nt (16)            |
| 2.32     | 2     | 29-32                   | 9       | IGHV2-2        | CARKGPQLVFDYD       | IGKV6-23       | CQQYSSYPPTF  | 19 nt (6)             |
| 2.35     | 2     | 33-39                   | 8       | IGHV1-81       | CARLLYGYGYLDYD      | IGKV14-111     | CLQYDEFWTF   | 21 nt (12)            |
| 2.36     | 2     | 33-39                   | 8       | IGHV1-39       | CARWGEIYPYAMDYD     | IGKV10-96      | CQQGNTLPWTF  | 29 nt (17)            |
| 2.37     | 2     | 33-39                   | 8       | IGHV1-54       | CARSDGNEDYD         | IGKV4-55       | CQWSSYPFAT   | 13 nt (3)             |
| 2.38     | 2     | 33-39                   | 8       | IGHV8-11       | CARIYYSRHRFDYD      | IGKV3-4        | CQQSYEDPTF   | 18 nt (10)            |
| 2.42     | 2     | 40-48                   | 7       | IGHV1-4        | CARSNDGGFAYD        | IGKV4-59       | CQWSSNPPTF   | 9 nt (4)              |
| 2.43     | 2     | 40-48                   | 7       | IGHV1-61       | CARSDDGYWFAYD       | IGKV3-7        | CQHSWEIPPTF  | 25 nt (13)            |
| 2.44     | 2     | 40-48                   | 7       | IGHV1-22       | CARGLPYHGLDNW       | IGKV4-61       | CQQYHSSPPTF  | 27 nt (20)            |
| 2.50     | 2     | 49-56                   | 6       | IGHV2-2        | CAKSPYYGAMDYD       | IGKV5-43       | CQSNNSWPPTF  | 12 nt (7)             |
| 2.52     | 2     | 49-56                   | 6       | IGHV1-69       | CTRDYHGTSSMDYD      | IGKV1-110      | CSQSTHVPWTF  | 48 nt (19)            |
| 2.53     | 2     | 49-56                   | 6       | IGHV2-3        | CAKTYGYAMDYD        | IGKV4-63       | CLQGSYPTF    | 22 nt (12)            |
| 2.54     | 2     | 49-56                   | 6       | IGHV1-26       | CARGITVVPYAMDYD     | IGKV10-96      | CQQGNTLPWTF  | 22 nt (12)            |
| 5.8      | 5     | 8-9                     | 17      | IGHV1-15       | CTREGYFYDVRVWFAYD   | IGKV2-109      | CAQNLLEPTF   | 12 nt (9)             |
| 5.9      | 5     | 8-9                     | 17      | IGHV14-3       | CASAATWAYWYFDVW     | IGKV4-91       | CQQGSSILPTF  | 3 nt (2)              |
| 5.10     | 5     | 10-11                   | 16      | IGHV9-3        | CARGDYGNERYVAWHAYD  | IGKV10-96      | CQQGDTVPPTF  | 24 nt (14)            |
| 5.11     | 5     | 10-11                   | 16      | IGHV14-3       | CARFGNYPYWYFDVW     | IGKV4-70       | CHQRSSYPYTF  | 10 nt (8)             |
| 5.19     | 5     | 19-21                   | 11      | IGHV4-1        | CARPGFRYGYAMDYD     | IGKV6-25       | CQQHYSTPYTF  | 10 nt (5)             |
| 5.21     | 5     | 19-21                   | 11      | IGHV5-9-1      | CSRDSYGSYGYFDVW     | IGKV13-85      | CQQYSSPPTF   | 5 nt (5)              |
| 5.22     | 5     | 22-24                   | 10      | IGHV2-3        | CAKFSYGSYGYAIDYD    | IGKV6-17       | CQQHYSTPLTF  | 19 nt (12)            |
| 5.23     | 5     | 22-24                   | 10      | IGHV5-17       | CAREFAYD            | IGKV12-44      | CQHHYGSPTF   | 7 nt (5)              |
| 5.24     | 5     | 22-24                   | 10      | IGHV1-64       | CARFSGYFDVW         | IGKV4-50       | CQQTSSPPTF   | 20 nt (8)             |
| 5.26     | 5     | 25-28                   | 9       | IGHV1-18       | CARSGYDFYD          | IGKV9-124      | CLQYSTYPWTF  | 33 nt (18)            |
| 5.27     | 5     | 25-28                   | 9       | IGHV3-1        | CARFYRSTGIAYD       | IGKV4-70       | CHQRHYPWTF   | 13 nt (7)             |
| 5.28     | 5     | 25-28                   | 9       | IGHV9-1        | CTQLGLLAWFAYD       | IGKV10-94      | CQQYSKLPPTF  | 13 nt (6)             |
| 5.30     | 5     | 29-38                   | 8       | IGHV1-63       | CARKNYGSTYFDYD      | IGKV1-117      | CFQGSHPWTF   | 15 nt (7)             |
| 5.31     | 5     | 29-38                   | 8       | IGHV1-9        | CVRRSPYDYDYD        | IGKV17-127     | CFQSDNMPYTF  | 19 nt (12)            |
| 5.32     | 5     | 29-38                   | 8       | IGHV1-66       | CAKNYGIHYGMDYD      | IGKV13-85      | CQQYWTIPYTF  | 18 nt (10)            |
| 5.34     | 5     | 29-38                   | 8       | IGHV5-6        | CARQVYDYGTMIDYD     | IGKV10-96      | CQQGNTLPRTF  | 18 nt (7)             |
| 5.35     | 5     | 29-38                   | 8       | IGHV8-8        | CARKAYFYDYFDYD      | IGKV6-23       | CQQYSSYPLTF  | 9 nt (6)              |
| 5.36     | 5     | 29-38                   | 8       | IGHV9-3        | CARGWGYFDYD         | IGKV6-17       | CQQHYSTPLTF  | 19 nt (12)            |
| 5.39     | 5     | 39-48                   | 7       | IGHV1-4        | CARRVGEYFYD         | IGKV4-79       | CHQWNSYPPTF  | 13 nt (8)             |
| 5.40     | 5     | 39-48                   | 7       | IGHV9-3        | CARAPLFYAMDYD       | IGLV1          | CALWYSNHWVTF | 17 nt (12)            |
| 5.42     | 5     | 39-48                   | 7       | IGHV1-76       | CARWGDSSGTAMDYD     | IGKV3-7        | CQHSWEIPLTF  | 37 nt (12)            |
| 5.43     | 5     | 39-48                   | 7       | IGHV4-1        | CARPGFRYGYAMDYD     | IGKV12-44      | CQHHYGTPLTF  | 10 nt (5)             |
| 5.45     | 5     | 39-48                   | 7       | IGHV8-12       | CARLYDGSYALDYD      | IGKV12-44      | CQHHYGTPTF   | 14 nt (8)             |
| 5.46     | 5     | 39-48                   | 7       | IGHV1-85       | CTTGDYLVHFDVW       | IGKV15-103     | CQQGQSYPTF   | 30 nt (17)            |
| 5.47     | 5     | 39-48                   | 7       | IGHV2-9-1      | CVRRGGYGNFYWFFDVW   | IGKV1-117      | CFQGSHPVPTF  | 11 nt (7)             |
| 5.49     | 5     | 49-54                   | 6       | IGHV1-26       | CARRGSRFYD          | IGKV6-32       | CQQDYNPWTF   | 30 nt (16)            |

**Extended Data Table 2. Overview and characteristics of non-binders.** Clone ID corresponds to mouse number followed by clone index number corresponding to Fig. 1g.



| ID   | Mouse | IgG clone rank in mouse | # cells | V <sub>H</sub> | CDRH3           | V <sub>L</sub> | CDRL3       | nt dist. (aa-changes) |
|------|-------|-------------------------|---------|----------------|-----------------|----------------|-------------|-----------------------|
| 3.3  | 3     | 2-3                     | 14      | IGHV1-5        | CTRSDDYYFDYW    | IGKV4-70       | CHQRSNYPLTF | 13 nt (11)            |
| 3.4  | 3     | 4                       | 13      | IGHV8-12       | CARTRWEKYAMDYW  | IGKV19-93      | CLQYDNLTYF  | 9 nt (7)              |
| 4.3  | 4     | 3                       | 30      | IGHV1-54       | CARSDSSGDYW     | IGKV4-55       | CQQWSSYPFTF | 12 nt (5)             |
| 4.5  | 4     | 5-6                     | 19      | IGHV5-6        | CSRRGLVDGVYPMYD | IGKV6-23       | CQQYRTYPTF  | 21 nt (11)            |
| 4.6  | 4     | 5-6                     | 19      | IGHV8-12       | CVRRRLWLDYAMDND | IGKV10-96      | CQQGNTLPYTF | 16 nt (9)             |
| 4.14 | 4     | 14                      | 12      | IGHV1-19       | CAITRLDYW       | IGKV4-80       | CHQWSSYPFTF | 14 nt (4)             |

**Extended Data Table 2 (continued). Overview and characteristics of non-binders.** Clone ID corresponds to mouse number followed by clone index number corresponding to Fig. 1g.

| Primer    | Description                                                           | Sequence [5' -> 3']                                                                                |
|-----------|-----------------------------------------------------------------------|----------------------------------------------------------------------------------------------------|
| EpMap_1   | Reverse primer for pB33eCPX plasmid linearisation (step 1)            | CCAGTGCTGAAAGACATGCAA                                                                              |
| EpMap_2   | Forward primer for pB33eCPX plasmid linearisation (step 1)            | ACAACAAAAACCAGTACTACGGC                                                                            |
| EpMap_3   | Reverse primer for plasmid linearisation (step 2; library generation) | TTGTCCAGATTGTCCAGCTACAGAAG                                                                         |
| EpMap_4   | Forward primer for plasmid linearisation (step 2; library generation) | GGAGGGCAGTCTGGGCAG                                                                                 |
| EpMap_5   | Forward primer Sanger sequencing                                      | GTGGTTATGAAAAAATTGCATGTC                                                                           |
| EpMap_7   | Forward primer NGS PCR 1                                              | CCCTCCTTAATCCCCTGGTTATGAAAAAATTGCATGTC                                                             |
| EpMap_8   | Reverse primer NGS PCR 1                                              | GAGGAGAGAGAGAGATGCTTGCCAGTCGTTA                                                                    |
| EpMap_9   | Forward primer NGS PCR 2                                              | AATGATACGGCGACCACCGAGATCTACACTCTTCCCTACAC<br>GACGCTCTCCGATCTNNNNCCCTCTTAATCCC                      |
| EpMap_idx | Reverse primer NGS PCR 2 encoding <b>TruSeq IDX1</b>                  | CAAGCAGAAGACGGCATAAGAT <b>CGTGAT</b> GTGACTGGAGTT<br>CAGACGTGTGCTCTCCGATCTNNNNGAGGAGAGAGAGAGA<br>G |

**Extended Data Table 3. Primers used for bacterial epitope mapping and NGS library generation.**

| ssODN         | Description                                    | Sequence [5' -> 3']                                                                                                                                           |
|---------------|------------------------------------------------|---------------------------------------------------------------------------------------------------------------------------------------------------------------|
| EpMap1_ssODN  | Generation of epitope mapping starting plasmid | <b>TGAAAAAATTGCATGCTTTTCAGCACTGGCCGAGTCTGGCTTTCACAGCAGGAACCTCTGTAGCTGGA</b><br>CAATCTGGACAAGGAGGGCAGTCTGGGCAGTCAGGTGATT <b>ACAACAAAAACCAGTACTACGGCATCACTG</b> |
| EpMapW1_ssODN | Exemplary library ssODN for OVA index1         | <b>GGAACTTCTGTAGCTGGACAATCTGGACAA</b> ATGGGGTCCATTGGTGCAGCGAGTATGGAGTTCTGTTTTGA<br><b>TGTTGGAGGGCAGTCTGGGCAGTCAGGTGATTAC</b>                                  |

**Extended Data Table 4. ssODNs for epitope mapping library generation.** Cloning overhang sequences are indicated in bold. Insert sequence shown in red for exemplary library ssODN encodes for the first 15 a.a. of OVA.
